# Supplementary material
Source: MDPI journal article supplement (https://www.mdpi.com/2673-401X/4/1/6)

# **Palladium Catalyzed Ring-Opening of Diazabicyclic Olefins with 4-Halo-1,3-dicarbonyl compounds: Accessing 3(2*H*)-Furanone Appended Cyclopentenones**

Vishnu K. Omanakuttan, Alisha Valsan, Henning Hopf,\* and Jubi John\*

## **Supplementary Materials**

### **Table of Contents**

|                                                                                          |         |
|------------------------------------------------------------------------------------------|---------|
| 1. Optimization studies for intramolecular Heck coupling                                 | - S3    |
| Table S1 Optimization studies for intramolecular Heck coupling                           | - S3-S4 |
| 2. References                                                                            | -S4     |
| Figure S1 <sup>1</sup> H NMR and <sup>13</sup> C NMR Spectra of <b>3a</b>                | - S5    |
| Figure S2 <sup>1</sup> H- <sup>1</sup> H COSY Spectrum of <b>3a</b>                      | - S6    |
| Figure S3 HMQC Spectrum of <b>3a</b>                                                     | - S6    |
| Figure S4 HMBC Spectrum of <b>3a</b>                                                     | - S7    |
| Figure S5 1D-NOE Spectrum of <b>3a</b>                                                   | - S7    |
| Figure S6 <sup>1</sup> H NMR (500 MHz) & <sup>13</sup> C (125 MHz) Spectra of <b>3b</b>  | - S8    |
| Figure S7 <sup>1</sup> H NMR (500 MHz) & <sup>13</sup> C (125 MHz) Spectra of <b>3c</b>  | - S9    |
| Figure S8 <sup>1</sup> H NMR (500 MHz) & <sup>13</sup> C (125 MHz) Spectra of <b>3d</b>  | - S10   |
| Figure S9 <sup>1</sup> H NMR (500 MHz) & <sup>13</sup> C (125 MHz) Spectra of <b>3e</b>  | - S11   |
| Figure S10 <sup>1</sup> H NMR (500 MHz) & <sup>13</sup> C (125 MHz) Spectra of <b>3f</b> | - S12   |
| Figure S11 <sup>1</sup> H NMR (500 MHz) & <sup>13</sup> C (125 MHz) Spectra of <b>3g</b> | - S13   |
| Figure S12 <sup>1</sup> H NMR (500 MHz) & <sup>13</sup> C (125 MHz) Spectra of <b>3h</b> | - S14   |
| Figure S13 <sup>1</sup> H NMR (500 MHz) & <sup>13</sup> C (125 MHz) Spectra of <b>3i</b> | - S15   |
| Figure S14 <sup>1</sup> H NMR (500 MHz) & <sup>13</sup> C (125 MHz) Spectra of <b>3j</b> | - S16   |
| Figure S15 <sup>1</sup> H NMR (500 MHz) & <sup>13</sup> C (125 MHz) spectra of <b>3k</b> | - S17   |
| Figure S16 <sup>1</sup> H NMR (500 MHz) & <sup>13</sup> C (125 MHz) Spectra of <b>5a</b> | - S18   |
| Figure S17 <sup>1</sup> H NMR (500 MHz) & <sup>13</sup> C (125 MHz) Spectra of <b>5b</b> | - S19   |
| Figure S18 <sup>1</sup> H NMR (500 MHz) & <sup>13</sup> C (125 MHz) Spectra of <b>5c</b> | - S20   |

|                                                                                        |       |
|----------------------------------------------------------------------------------------|-------|
| Figure S19 $^1\text{H}$ NMR (500 MHz) & $^{13}\text{C}$ (125 MHz) Spectra of <b>5d</b> | - S21 |
| Figure S20 $^1\text{H}$ NMR (500 MHz) & $^{13}\text{C}$ (125 MHz) Spectra of <b>5e</b> | - S22 |
| Figure S21 $^1\text{H}$ NMR (500 MHz) & $^{13}\text{C}$ (125 MHz) Spectra of <b>5f</b> | - S23 |
| Figure S22 $^1\text{H}$ NMR (500 MHz) & $^{13}\text{C}$ (125 MHz) Spectra of <b>7a</b> | - S24 |
| Figure S23 $^1\text{H}$ NMR (500 MHz) & $^{13}\text{C}$ (125 MHz) Spectra of <b>7b</b> | - S25 |
| Figure S24 $^1\text{H}$ NMR (500 MHz) & $^{13}\text{C}$ (125 MHz) Spectra of <b>7c</b> | - S26 |
| Figure S25 $^1\text{H}$ NMR (500 MHz) & $^{13}\text{C}$ (125 MHz) Spectra of <b>7d</b> | - S27 |

## 1. Optimization studies for intramolecular Heck coupling

Hydroazocines are 8-membered heterocycles with one *N*-atom.<sup>1</sup> These are known to exhibit interesting biological properties and there are several synthetic methodologies for accessing these molecules.<sup>2</sup> Owing to the importance of this eight-membered heterocycle, we chose to optimize the conditions for intramolecular Heck coupling by taking the amine functionalized 3(2*H*)-furanone **7c** as the substrate (Table S1). We tried different Heck coupling and reductive Heck coupling conditions and all of these resulted in dehalogenation affording **7b**.

**Table S1.** Optimization studies<sup>a</sup>

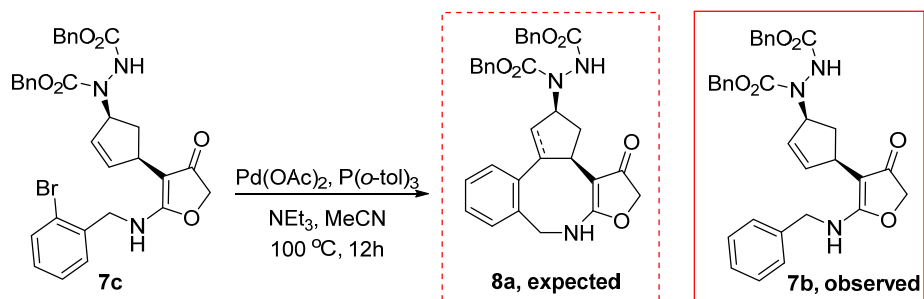

| Entry | Catalyst                        | Ligand                     | Base                    | Additives | Solvent | Yield of<br>8a or 7b<br>(%) |
|-------|---------------------------------|----------------------------|-------------------------|-----------|---------|-----------------------------|
| 1     | $\text{Pd}(\text{OAc})_2$       | $\text{P}(o\text{-tol})_3$ | $\text{NEt}_3$          | -         | MeCN    | 62                          |
| 2     | $\text{Pd}(\text{OCOCF}_3)_2$   | $\text{P}(o\text{-tol})_3$ | $\text{NEt}_3$          | -         | MeCN    | 52                          |
| 3     | $\text{Pd}(\text{PPh}_3)_4$     | $\text{P}(o\text{-tol})_3$ | $\text{NEt}_3$          | -         | MeCN    | trace                       |
| 4     | $\text{PdCl}_2$                 | $\text{P}(o\text{-tol})_3$ | $\text{NEt}_3$          | -         | MeCN    | trace                       |
| 5     | $\text{PdCl}_2(\text{PPh}_3)_2$ | $\text{P}(o\text{-tol})_3$ | $\text{NEt}_3$          | -         | MeCN    | NR                          |
| 6     | $\text{Pd}(\text{OAc})_2$       | $\text{PPh}_3$             | $\text{NEt}_3$          | -         | MeCN    | 50                          |
| 7     | $\text{Pd}(\text{OAc})_2$       | <i>R</i> -BINAP            | $\text{NEt}_3$          | -         | MeCN    | 50                          |
| 8     | $\text{Pd}(\text{OAc})_2$       | $\text{P}(o\text{-tol})_3$ | $\text{K}_2\text{CO}_3$ | -         | MeCN    | NR                          |
| 9     | $\text{Pd}(\text{OAc})_2$       | $\text{P}(o\text{-tol})_3$ | DIEA                    | -         | MeCN    | trace                       |
| 10    | $\text{Pd}(\text{OAc})_2$       | $\text{P}(o\text{-tol})_3$ | $\text{NEt}_3$          | -         | Toluene | trace                       |

|                 |                      |                                |                  |                     |      |       |
|-----------------|----------------------|--------------------------------|------------------|---------------------|------|-------|
| 11              | Pd(OAc) <sub>2</sub> | P( <i>o</i> -tol) <sub>3</sub> | NEt <sub>3</sub> | -                   | DMF  | trace |
| 12 <sup>b</sup> | Pd(OAc) <sub>2</sub> | P( <i>o</i> -tol) <sub>3</sub> | NEt <sub>3</sub> | -                   | MeCN | 65    |
| 13              | Pd(OAc) <sub>2</sub> | -                              | DIEA             | -                   | NMP  | NR    |
| 14              | Pd(OAc) <sub>2</sub> | <i>R</i> -BINAP                | TMEDA            | HCOOH               | MeCN | NR    |
| 15              | Pd(OAc) <sub>2</sub> | P( <i>o</i> -tol) <sub>3</sub> | -                | HCOONa              | MeCN | trace |
| 16              | Pd(OAc) <sub>2</sub> | P( <i>o</i> -tol) <sub>3</sub> | NEt <sub>3</sub> | HCOONa              | MeCN | trace |
| 17              | Pd(OAc) <sub>2</sub> | P( <i>o</i> -tol) <sub>3</sub> | NEt <sub>3</sub> | HCOONa/<br>TBAB     | MeCN | NR    |
| 18              | Pd(OAc) <sub>2</sub> | P( <i>o</i> -tol) <sub>3</sub> | NEt <sub>3</sub> | Bu <sub>4</sub> NCl | MeCN | trace |

Reaction conditions: <sup>a</sup> **7c** (1.0 equiv., 0.05 mmol), base (1.0 equiv.), catalyst (10 mol%), ligand (10 mol%), additives (1.0 equiv.), solvent (2.0 mL), 12 h, 100 °C, Isolated yields are reported; <sup>b</sup> catalyst (5 mol%).

## 2. References

1. M. Sutharchanadevi, R. Murugan, 9.18 - Eight-membered Rings with One Nitrogen Atom, (Editor(s): A. R. Katritzky, C. W. Rees, E. F. V. Scriven) Comprehensive Heterocyclic Chemistry II, Pergamon, **1996**, Pages 403-428.
2. A. V. Listratova, L. G. Voskressensky, *Synthesis* **2017**, *49*, 3801.

Figure S1  $^1\text{H}$  NMR (500 MHz) &  $^{13}\text{C}$  (125 MHz) Spectra of **3a**

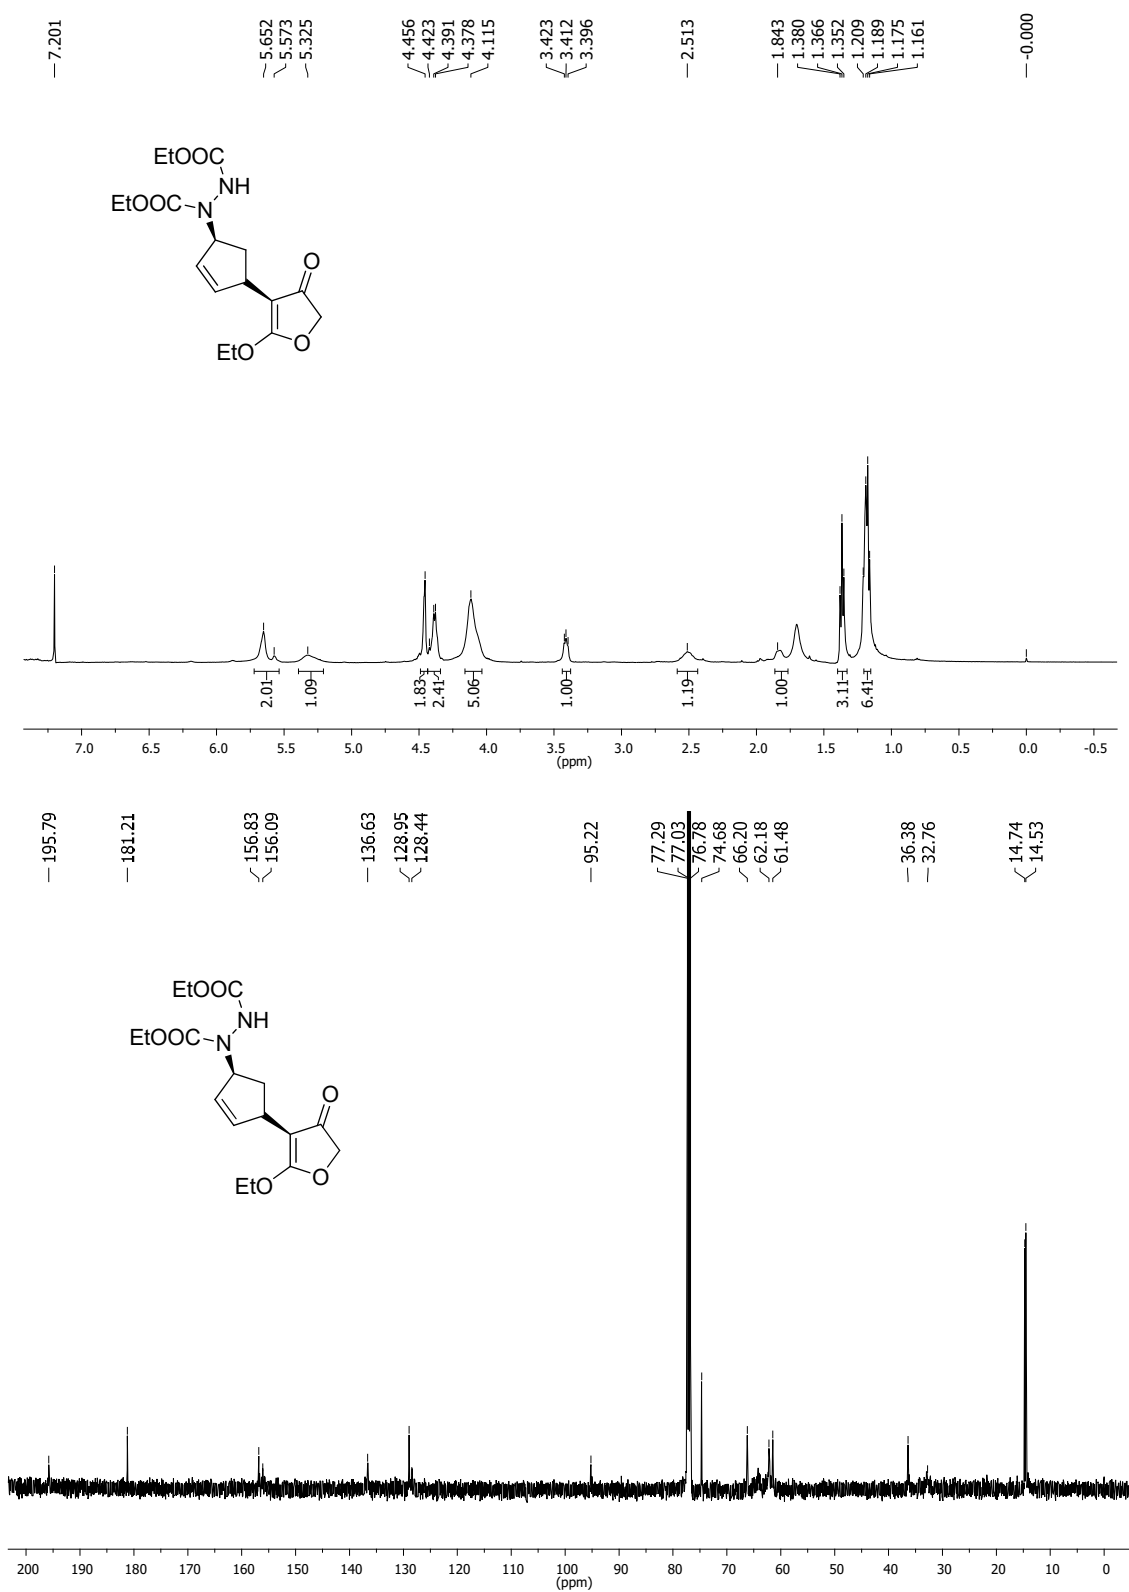

Figure S2  $^1\text{H}$ - $^1\text{H}$  COSY Spectrum of **3a**

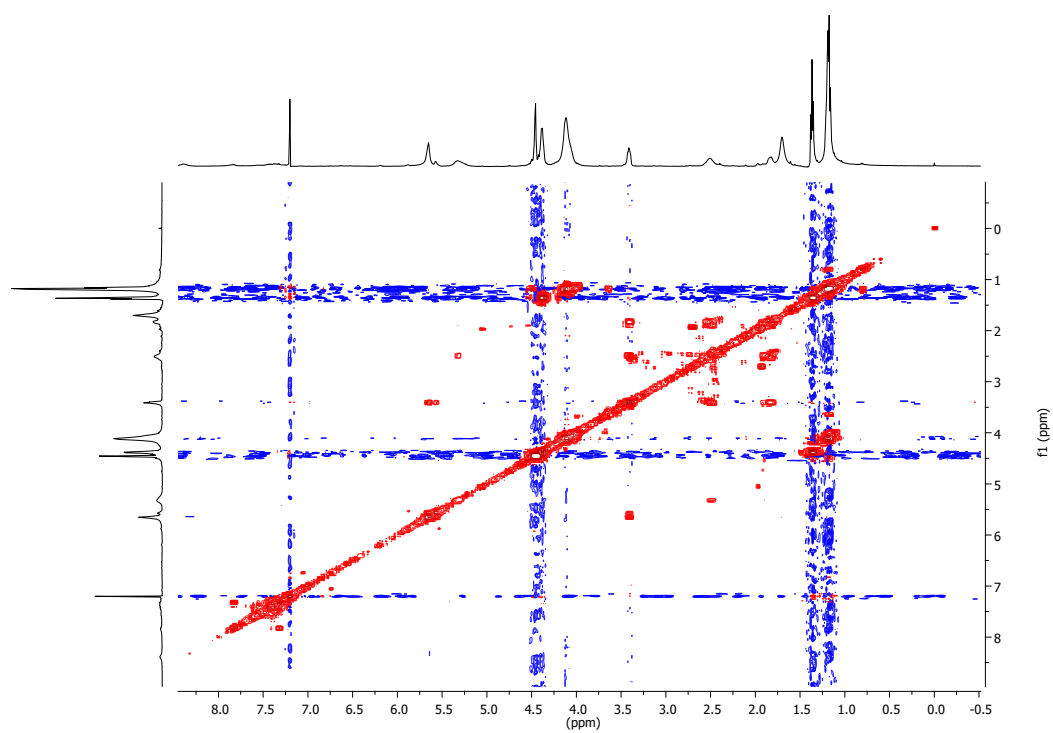

Figure S3 HMQC Spectrum of **3a**

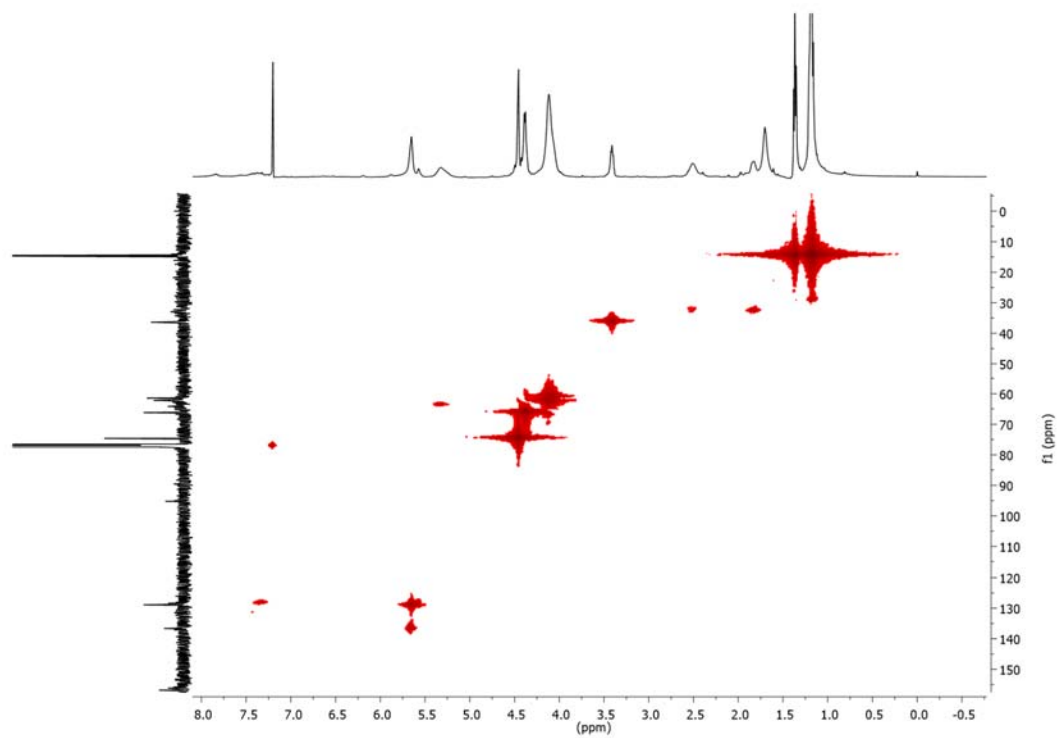

Figure S4 HMBC Spectrum of **3a**

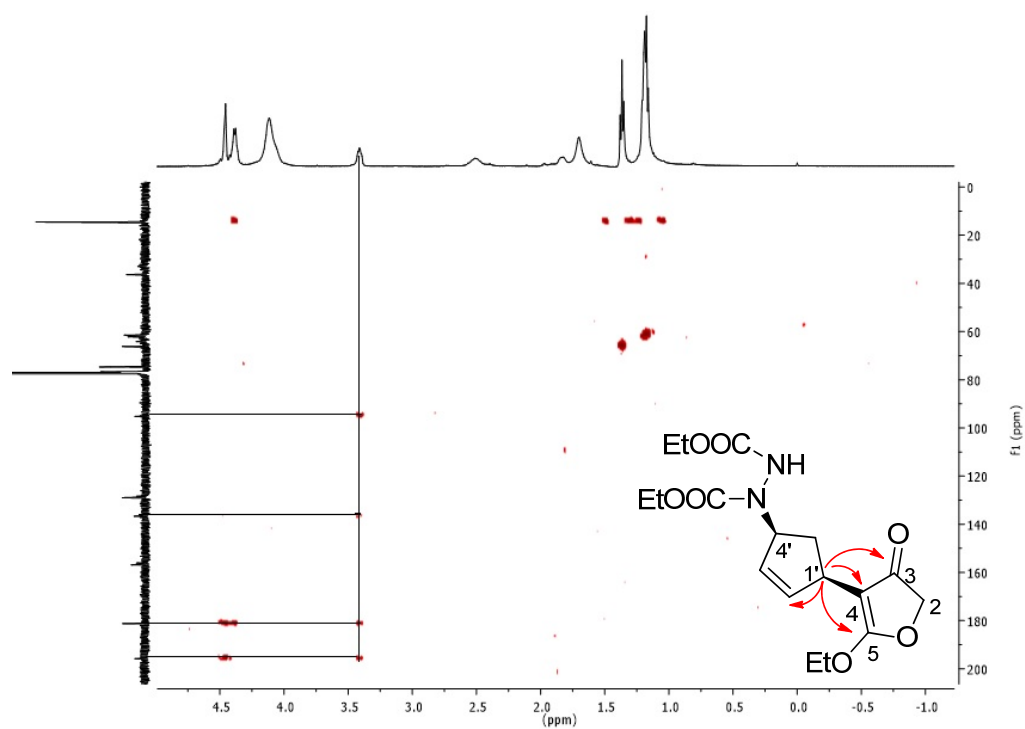

Figure S5 1D-NOE Spectrum of **3a**

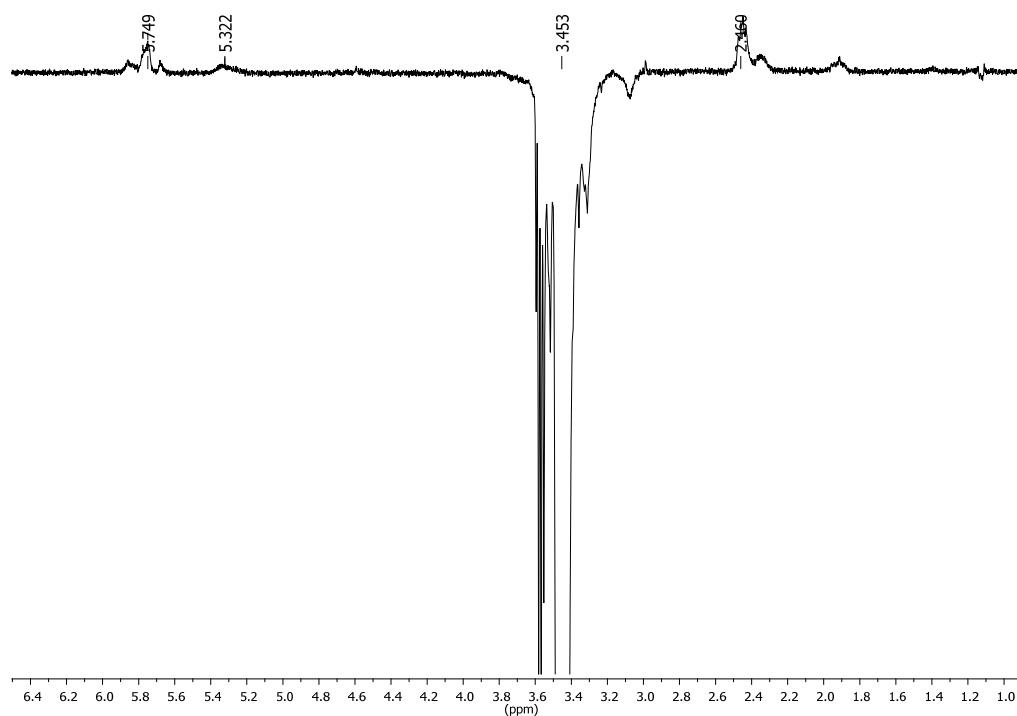

Figure S6  $^1\text{H}$  NMR (500 MHz) &  $^{13}\text{C}$  (125 MHz) Spectra of **3b**

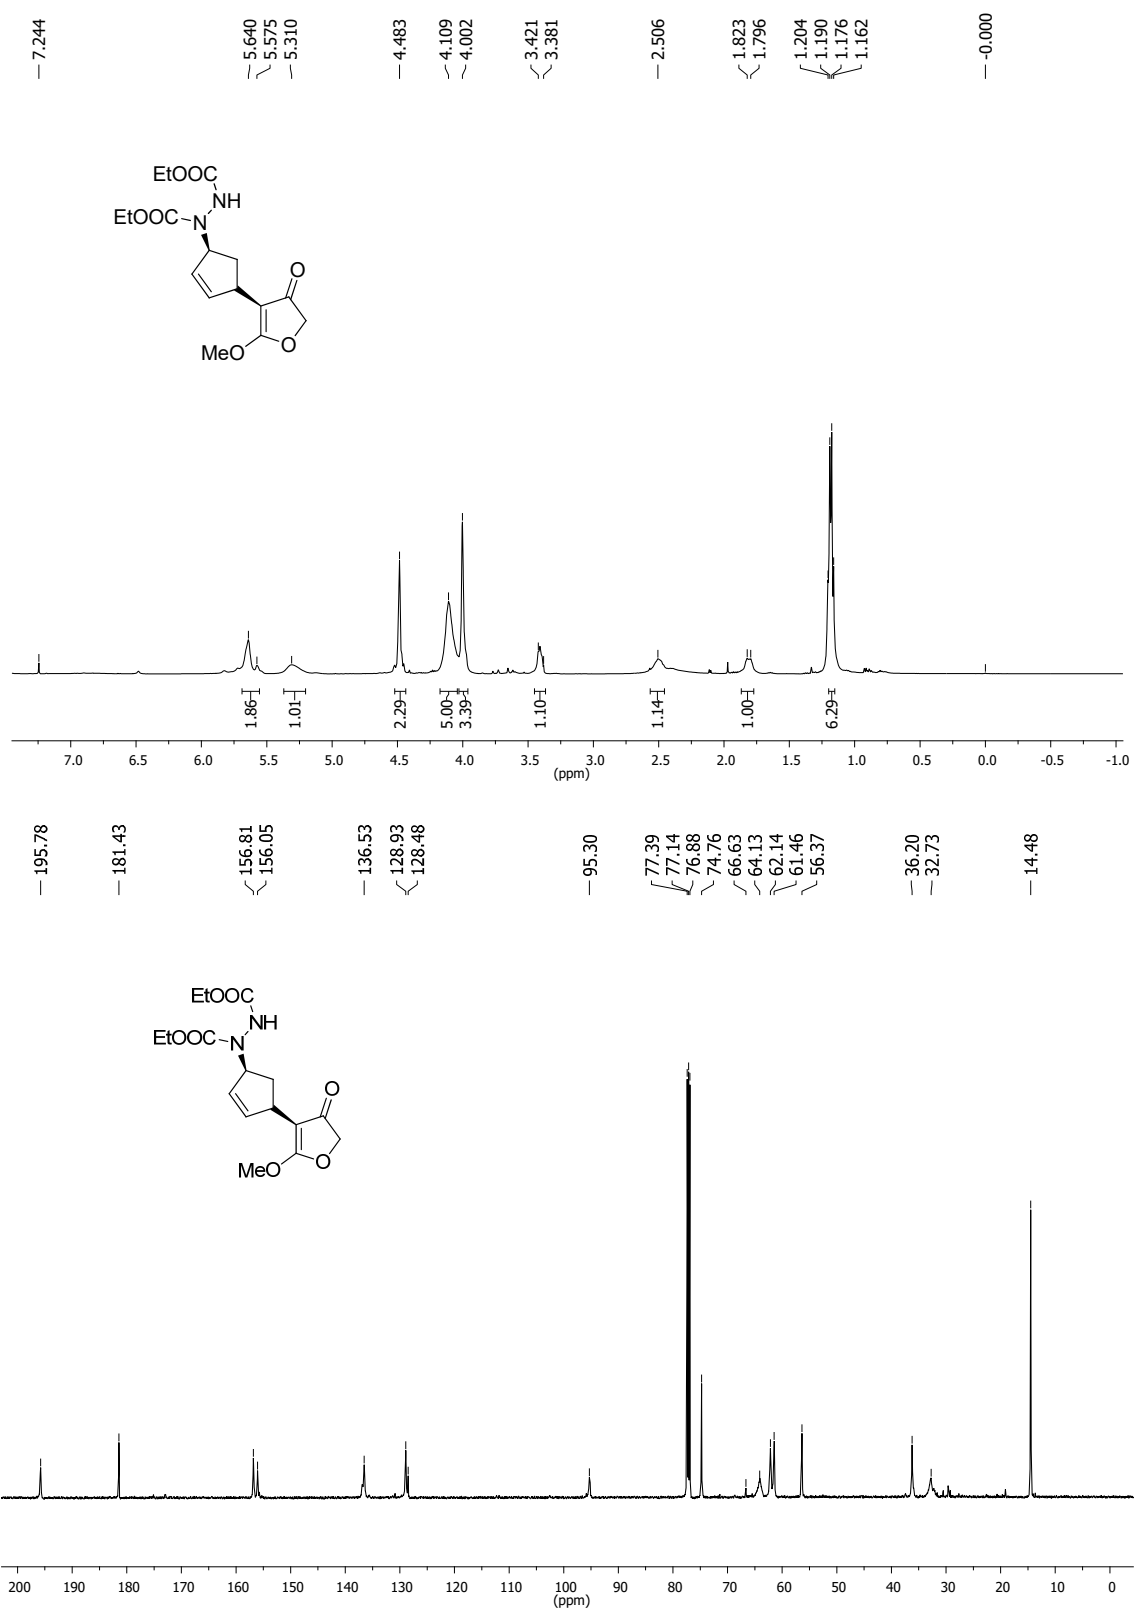



Figure S7  $^1\text{H}$  NMR (500 MHz) &  $^{13}\text{C}$  (125 MHz) Spectra of **3c**

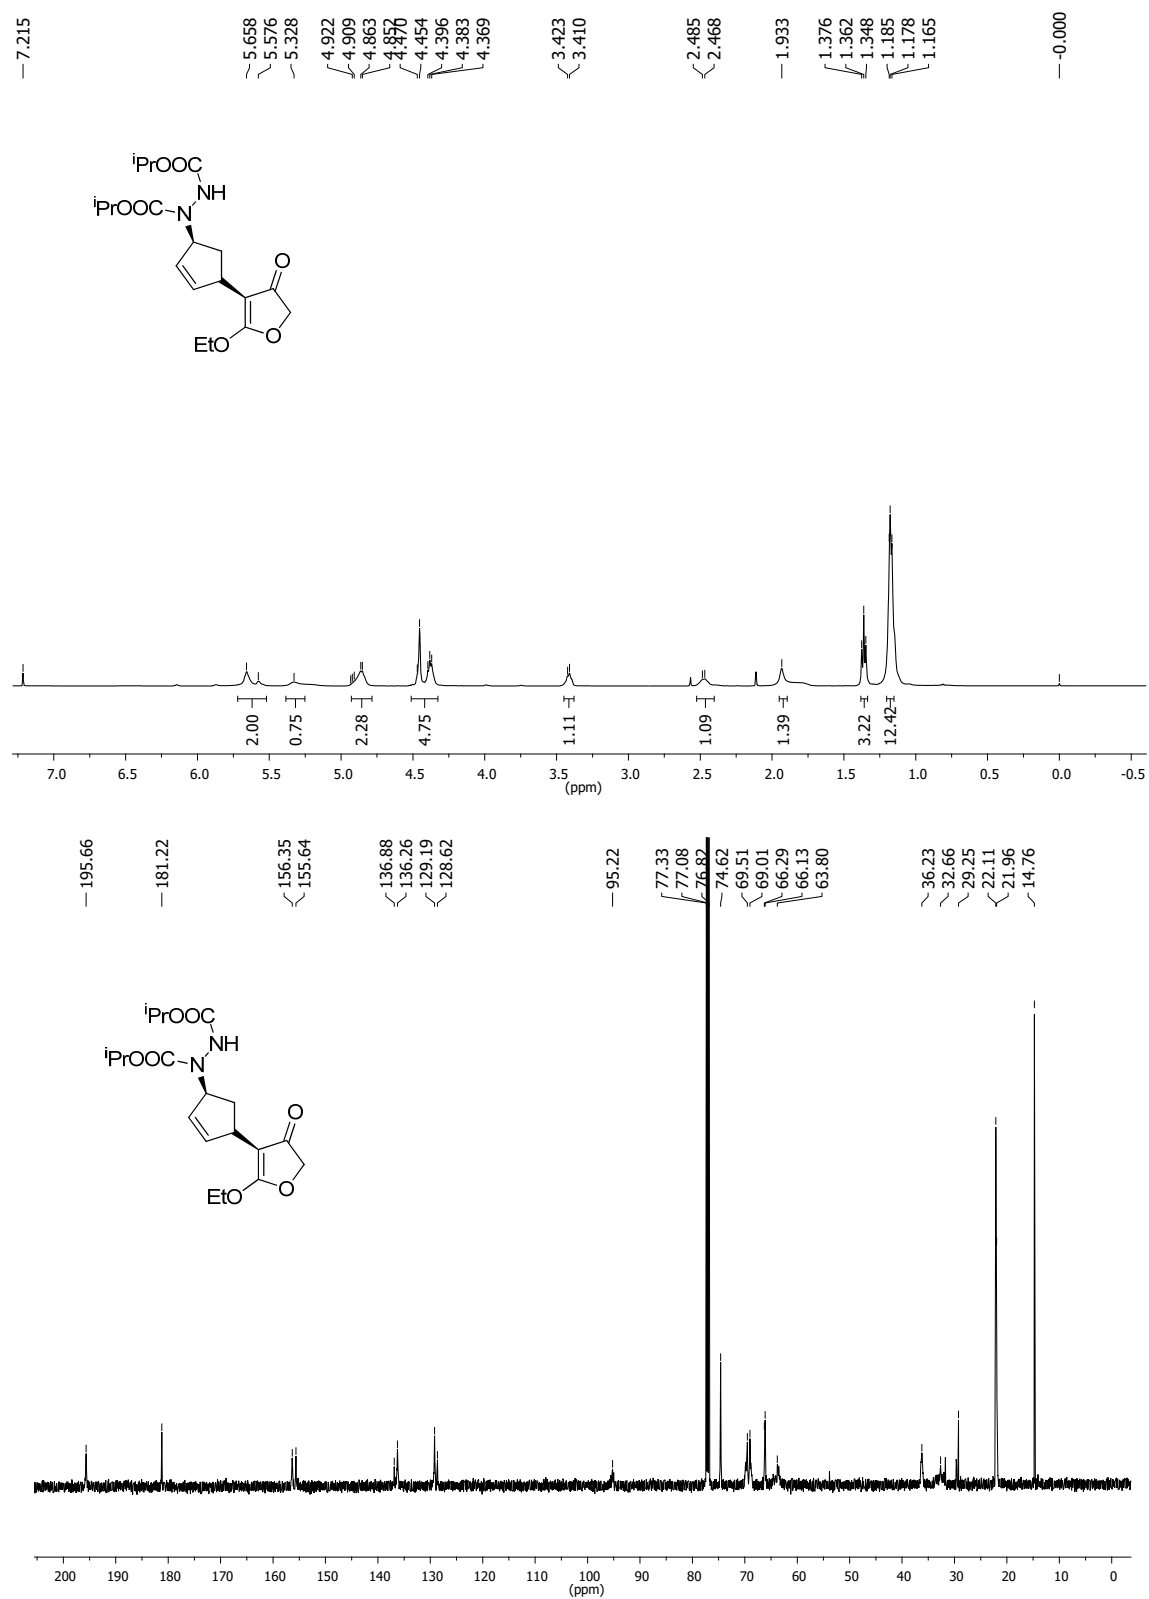

Figure S8  $^1\text{H}$  NMR (500 MHz) &  $^{13}\text{C}$  (125 MHz) Spectra of **3d**

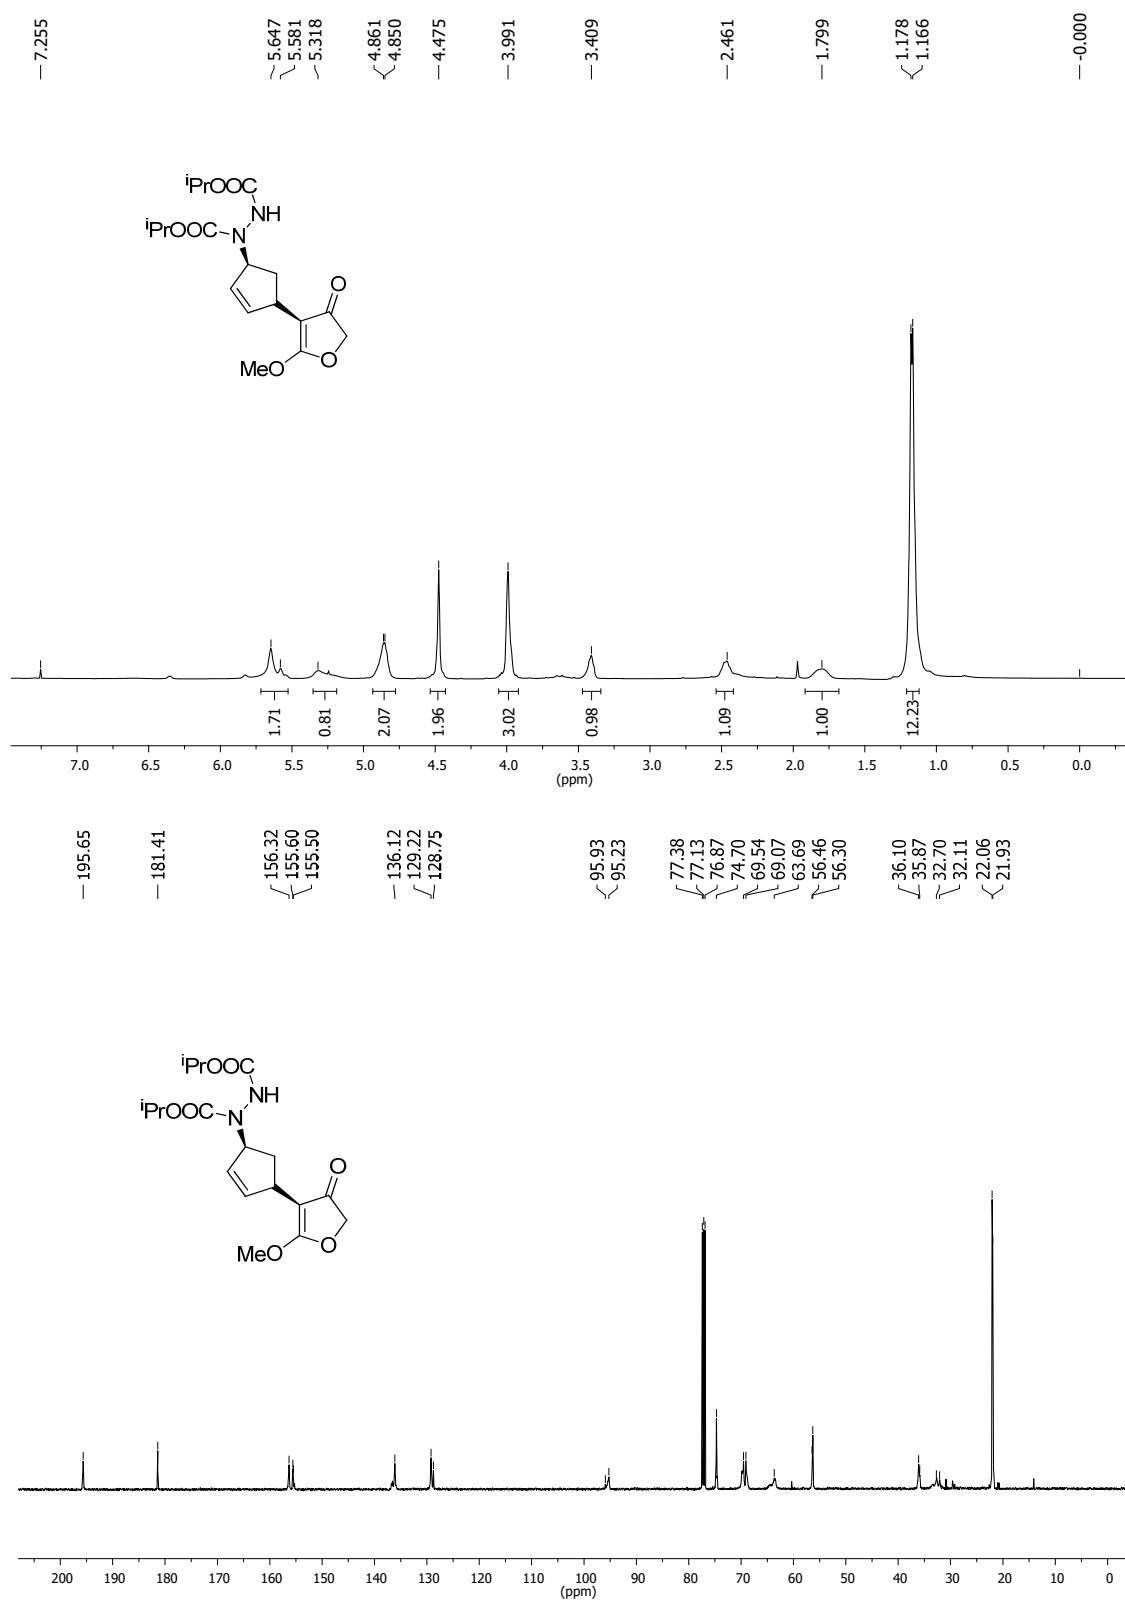

Figure S9  $^1\text{H}$  NMR (500 MHz) &  $^{13}\text{C}$  (125 MHz) Spectra of **3e**

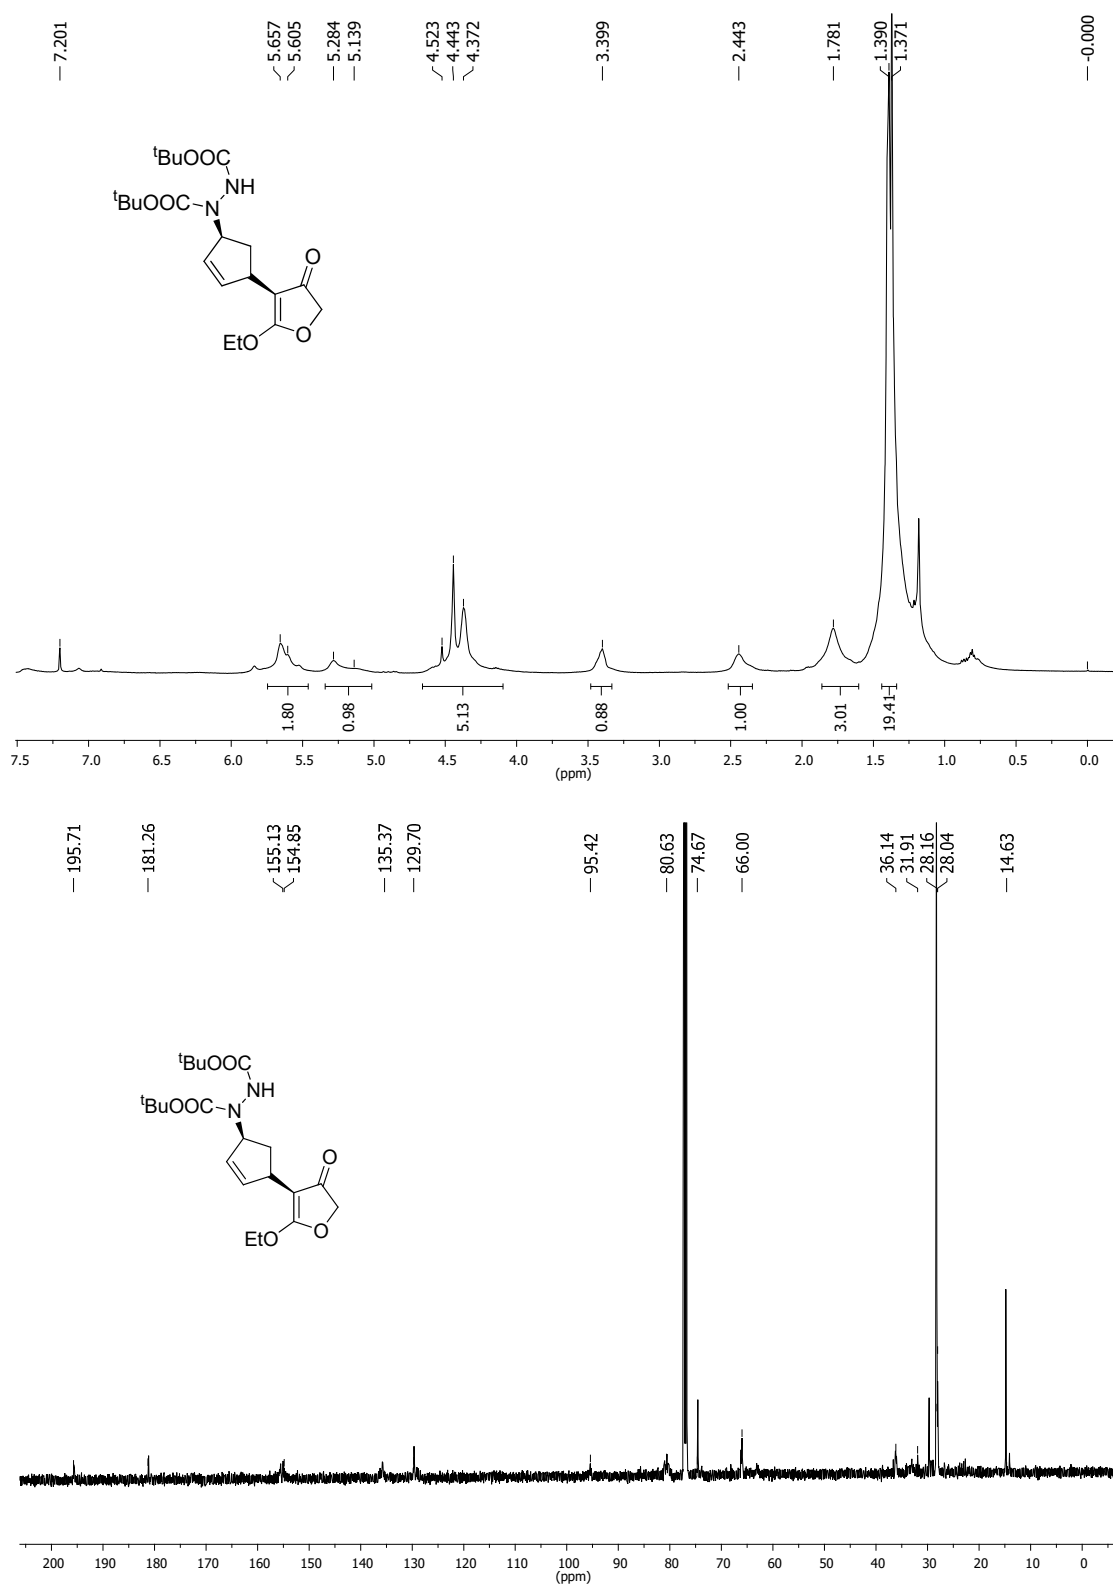

Figure S10  $^1\text{H}$  NMR (500 MHz) &  $^{13}\text{C}$  (125 MHz) Spectra of **3f**

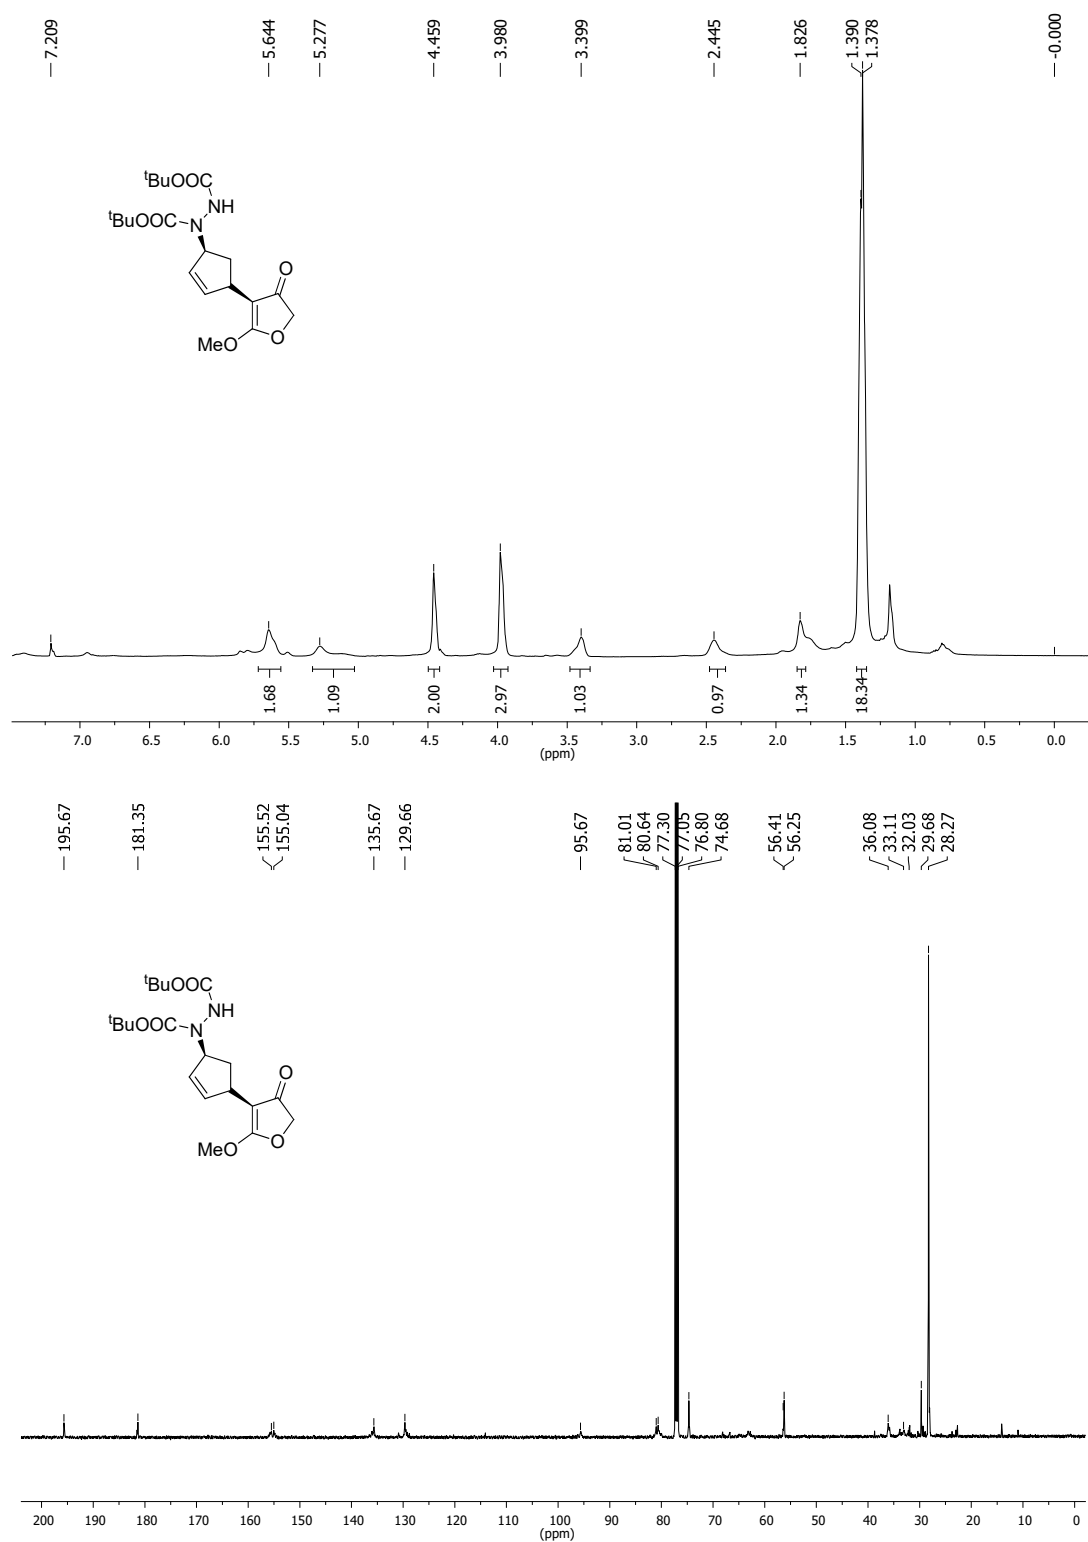

Figure S11  $^1\text{H}$  NMR (500 MHz) &  $^{13}\text{C}$  (125 MHz) Spectra of **3g**

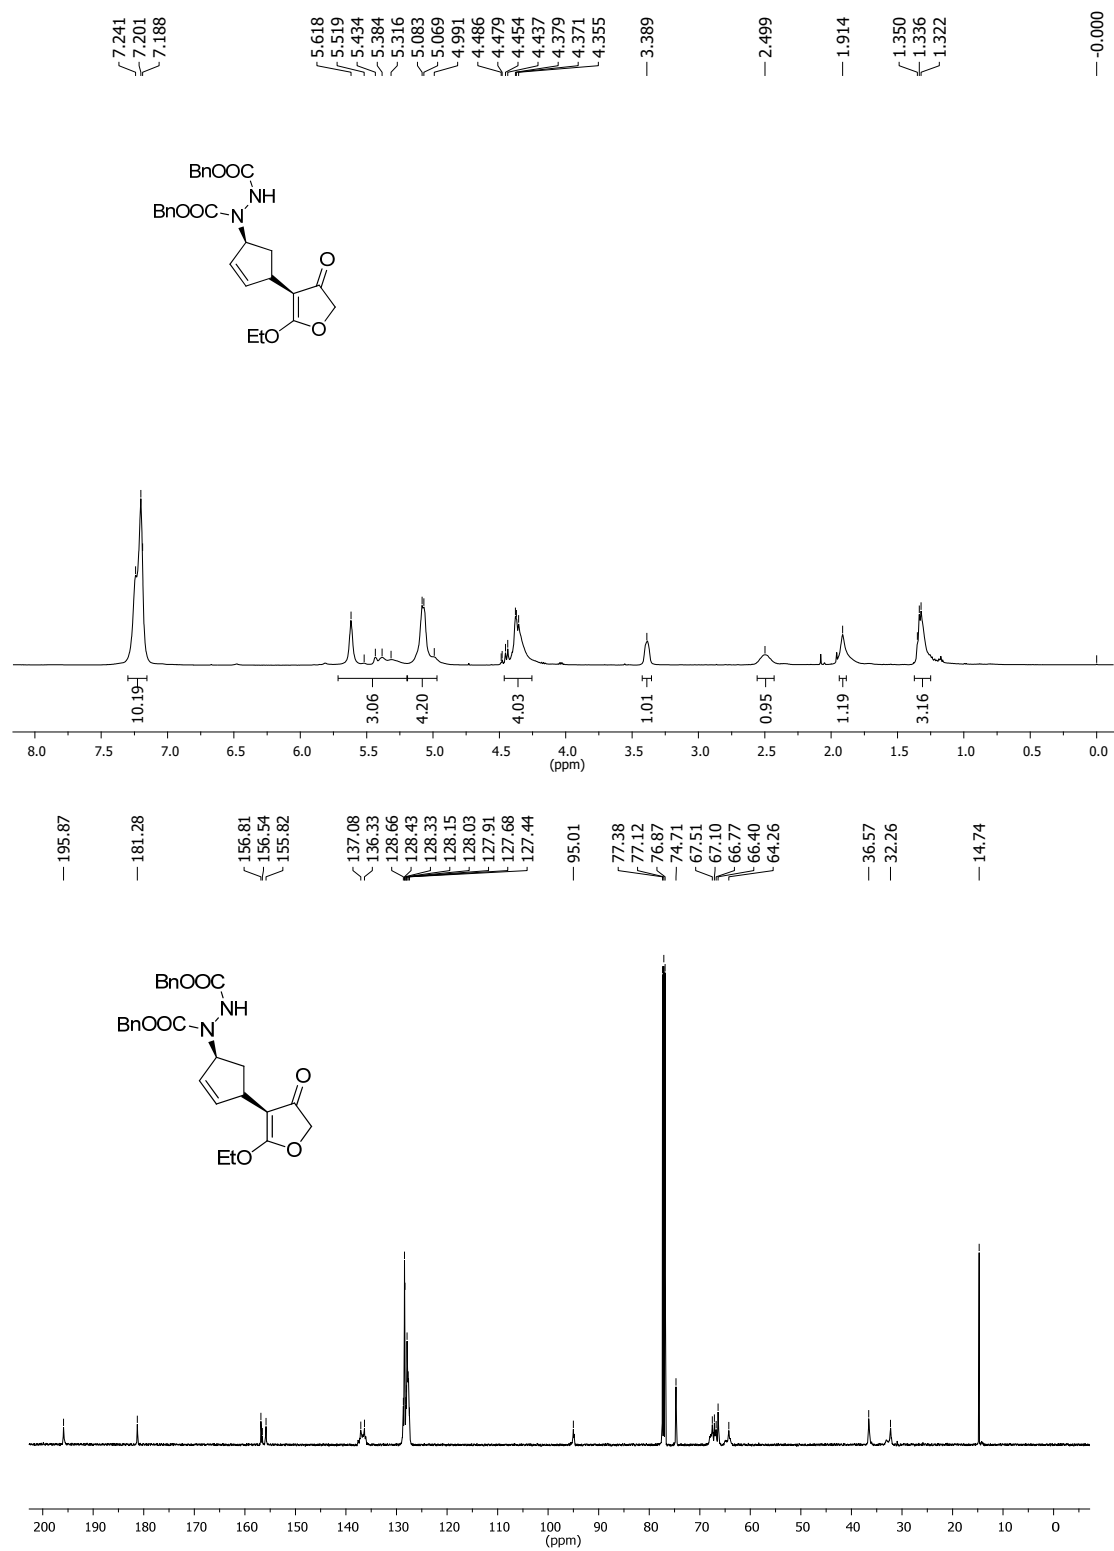

Figure S12  $^1\text{H}$  NMR (500 MHz) &  $^{13}\text{C}$  (125 MHz) Spectra of **3h**

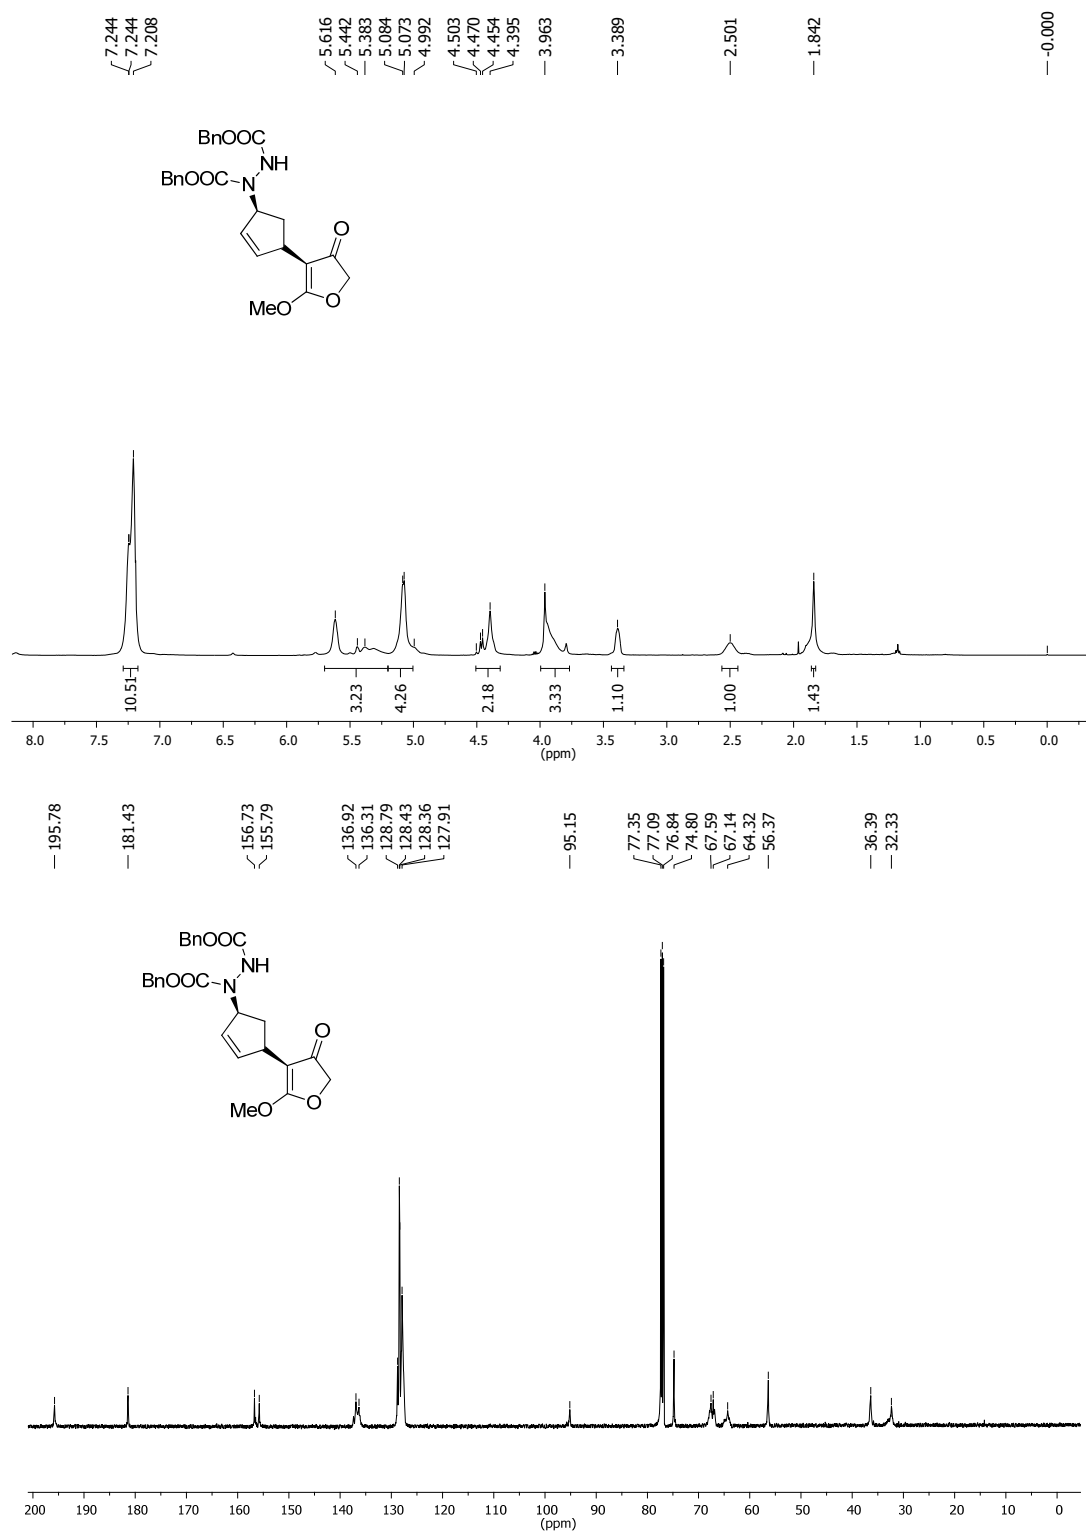

Figure S13  $^1\text{H}$  NMR (500 MHz) &  $^{13}\text{C}$  (125 MHz) Spectra of **3i**

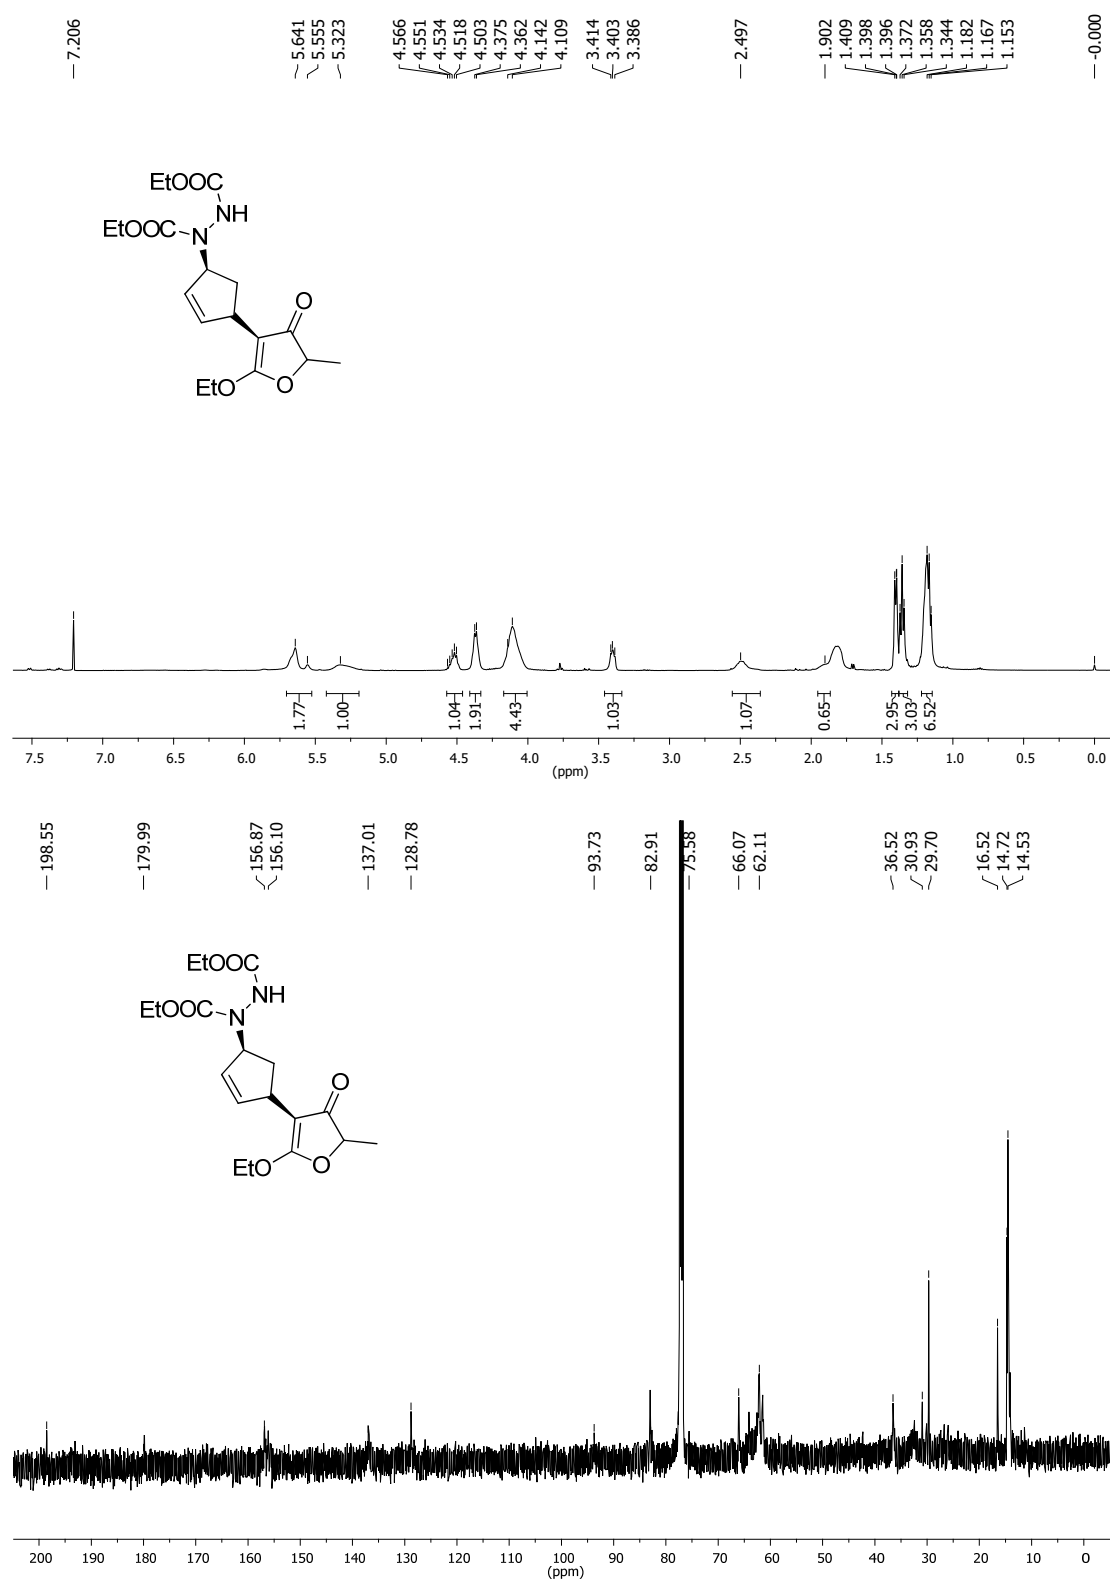

Figure S14  $^1\text{H}$  NMR (500 MHz) &  $^{13}\text{C}$  (125 MHz) Spectra of **3j**

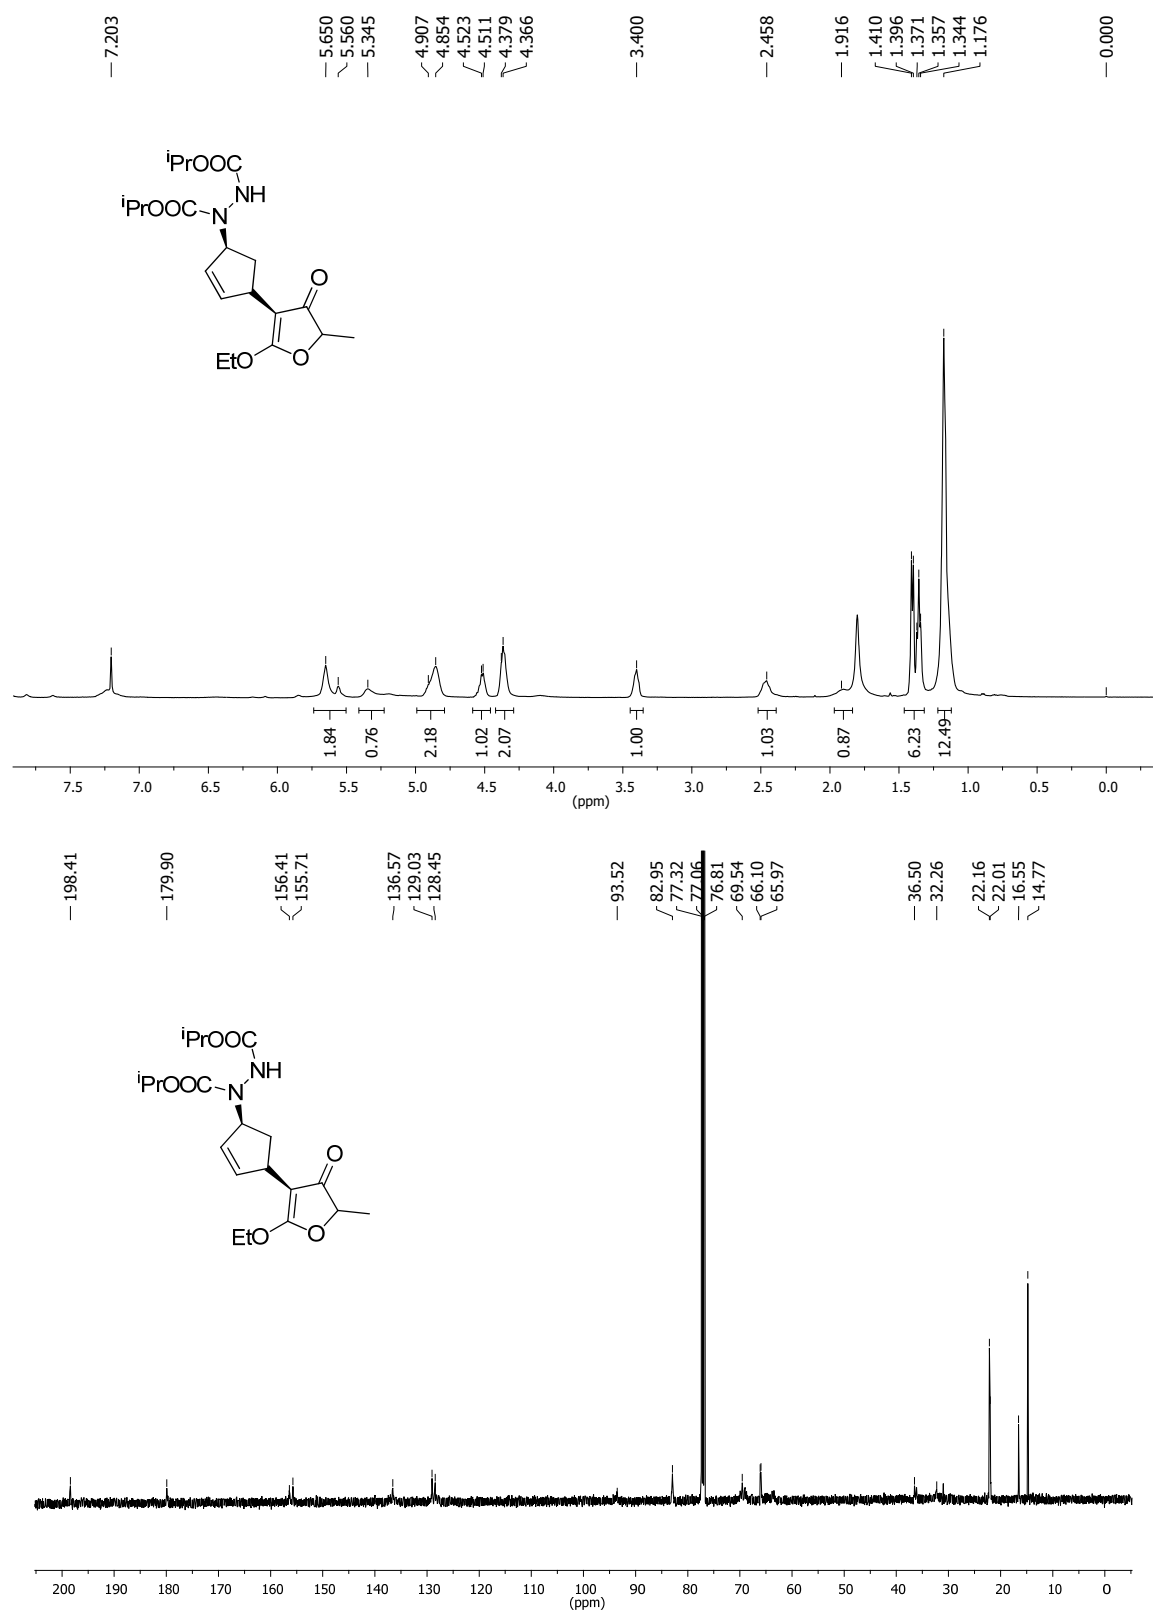



Figure S15  $^1\text{H}$  NMR (500 MHz) &  $^{13}\text{C}$  (125 MHz) spectra of **3k**

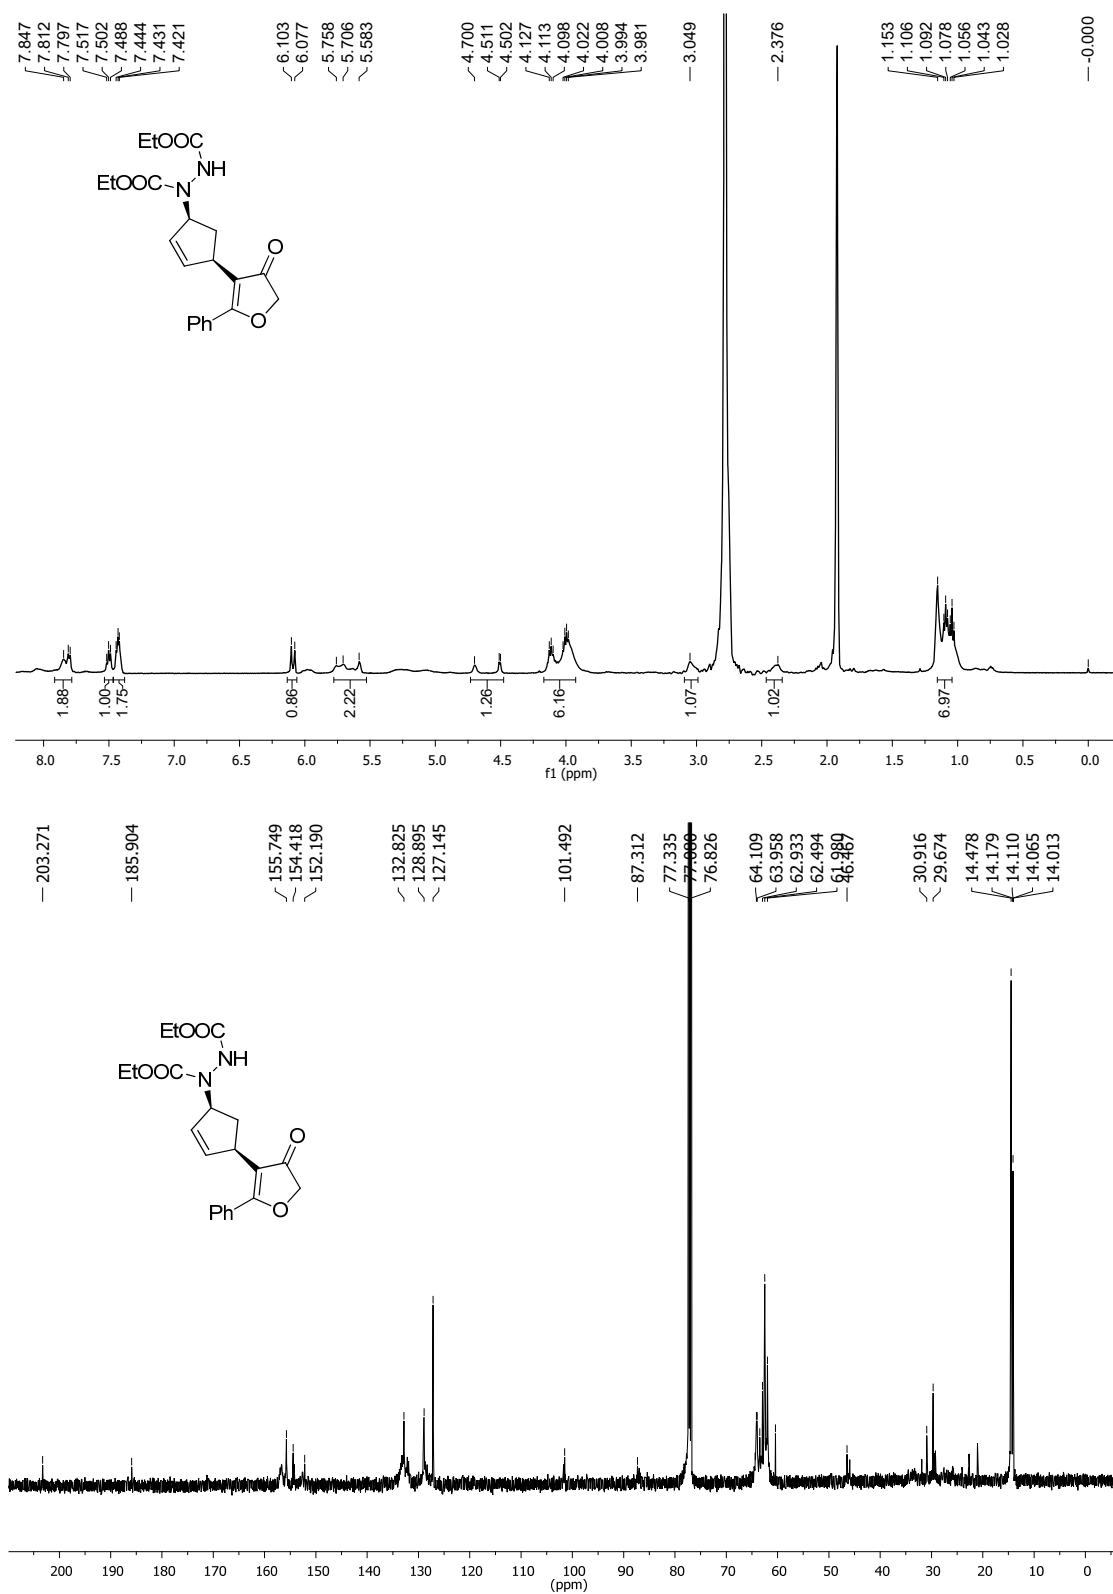

Figure S16  $^1\text{H}$  NMR (500 MHz) &  $^{13}\text{C}$  (125 MHz) Spectra of **5a**

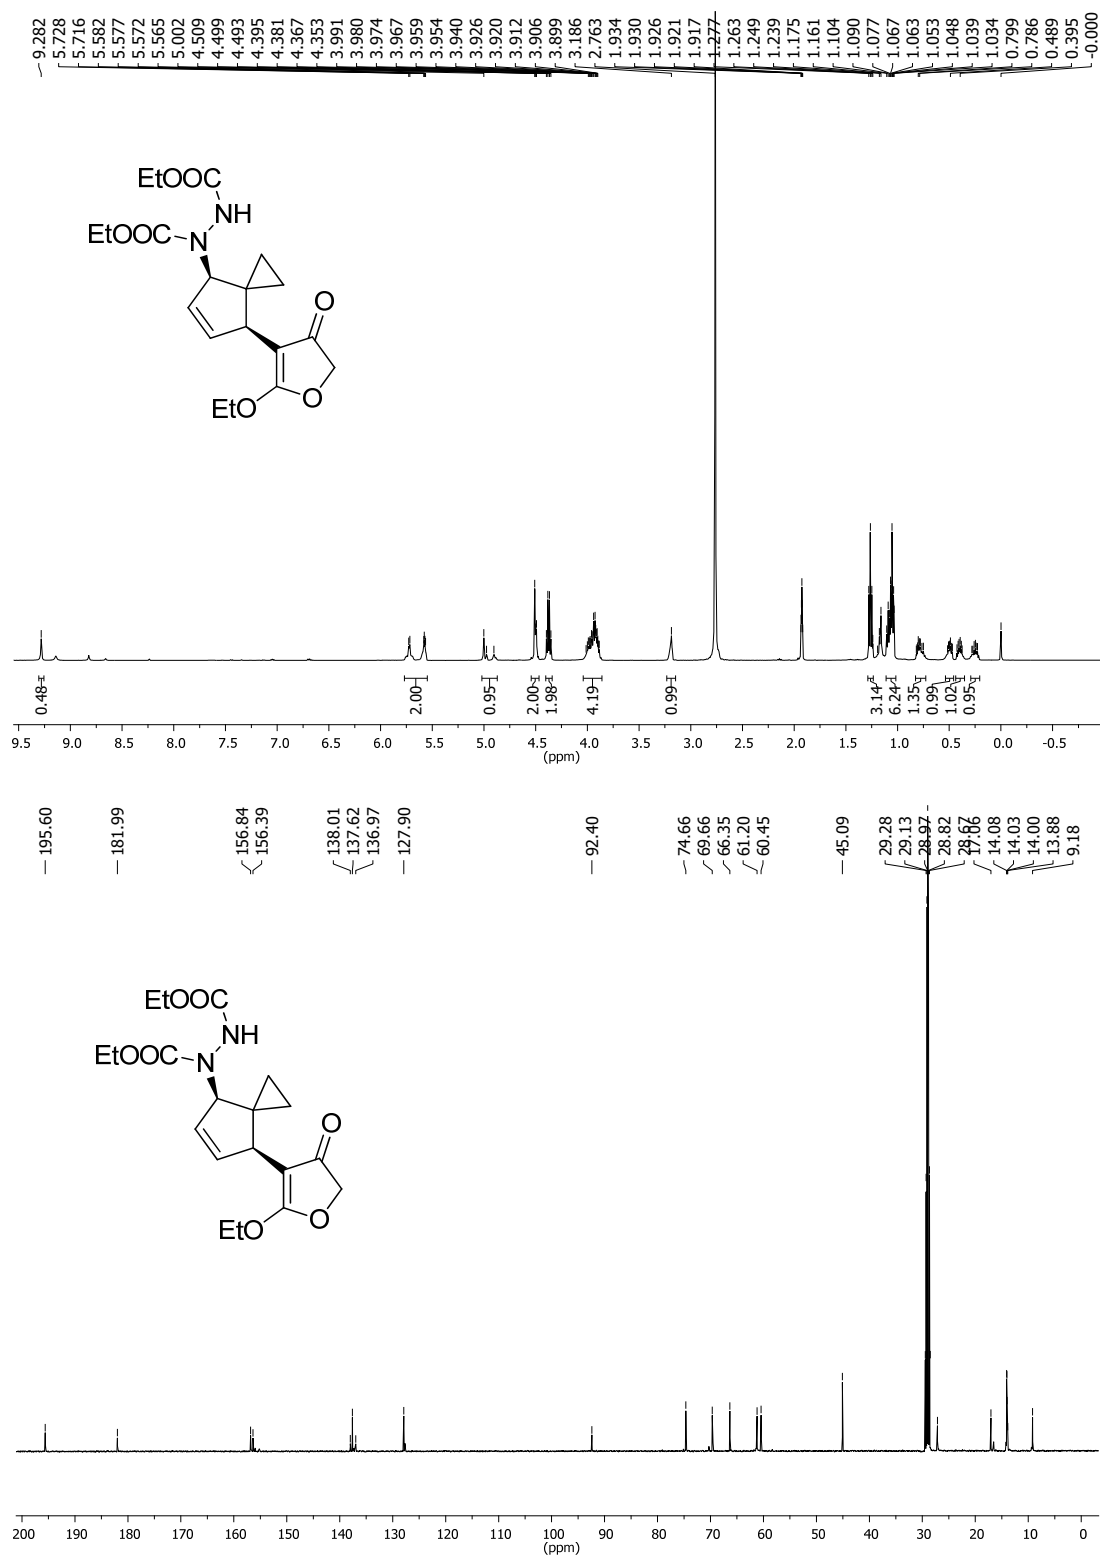

Figure S17  $^1\text{H}$  NMR (500 MHz) &  $^{13}\text{C}$  (125 MHz) Spectra of **5b**

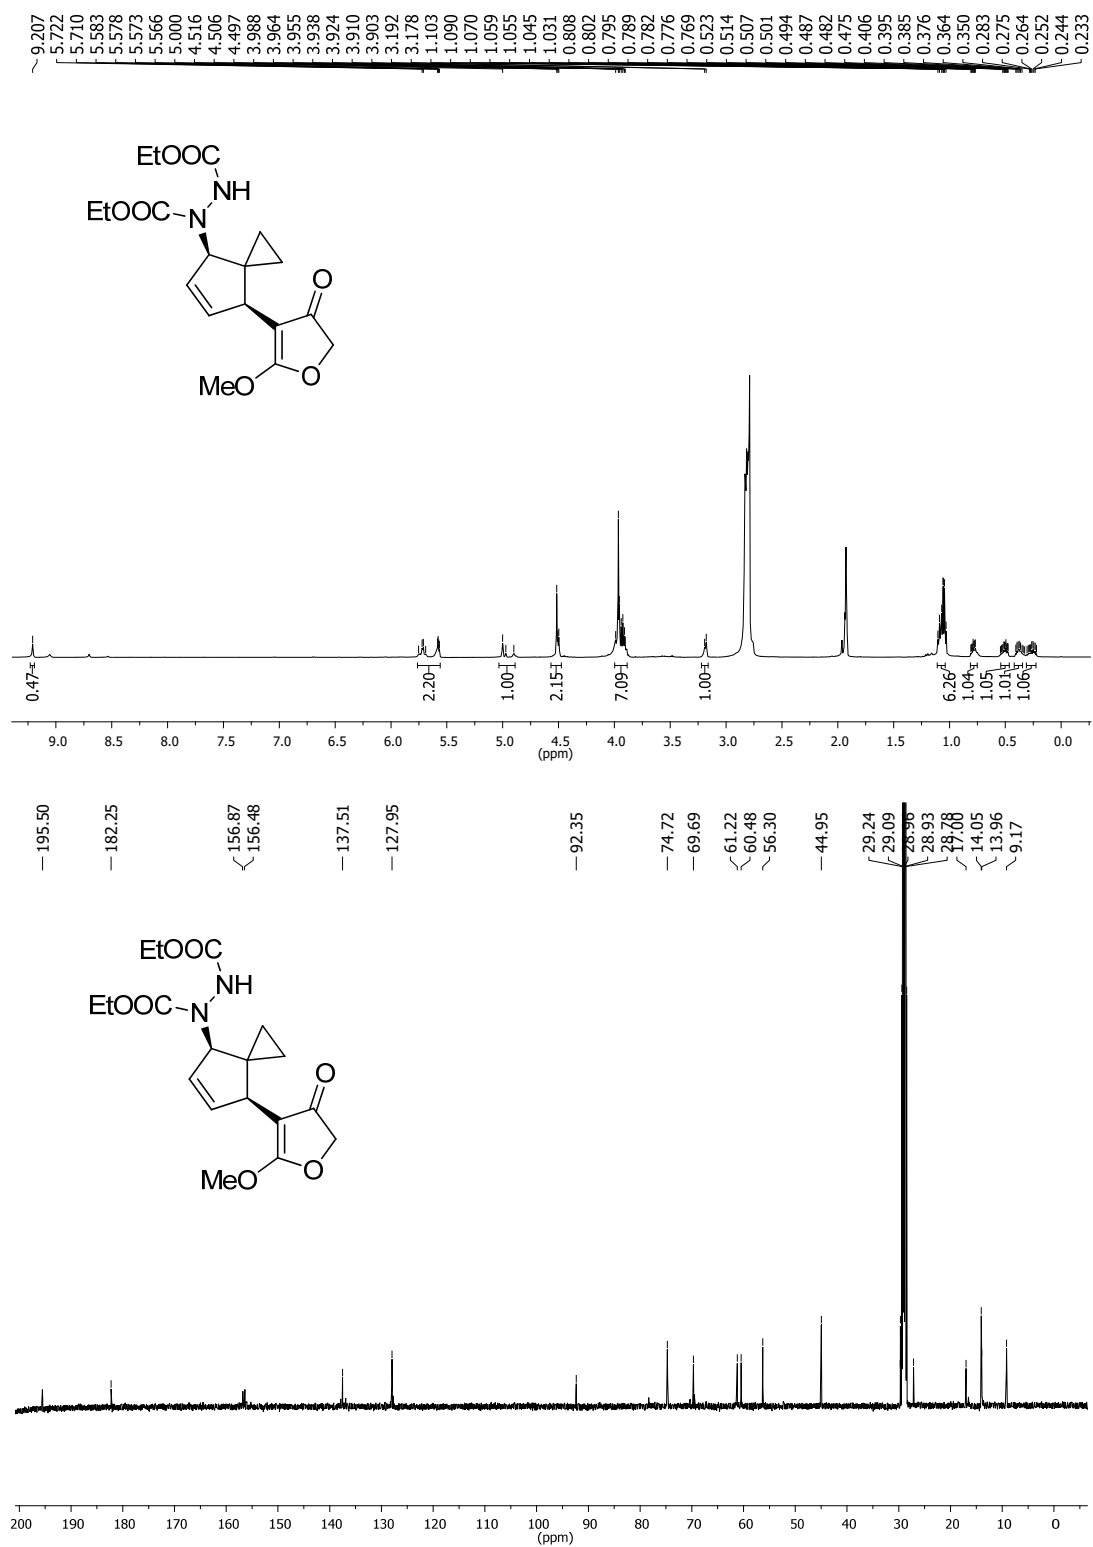

Figure S18  $^1\text{H}$  NMR (500 MHz) &  $^{13}\text{C}$  (125 MHz) Spectra of **5c**

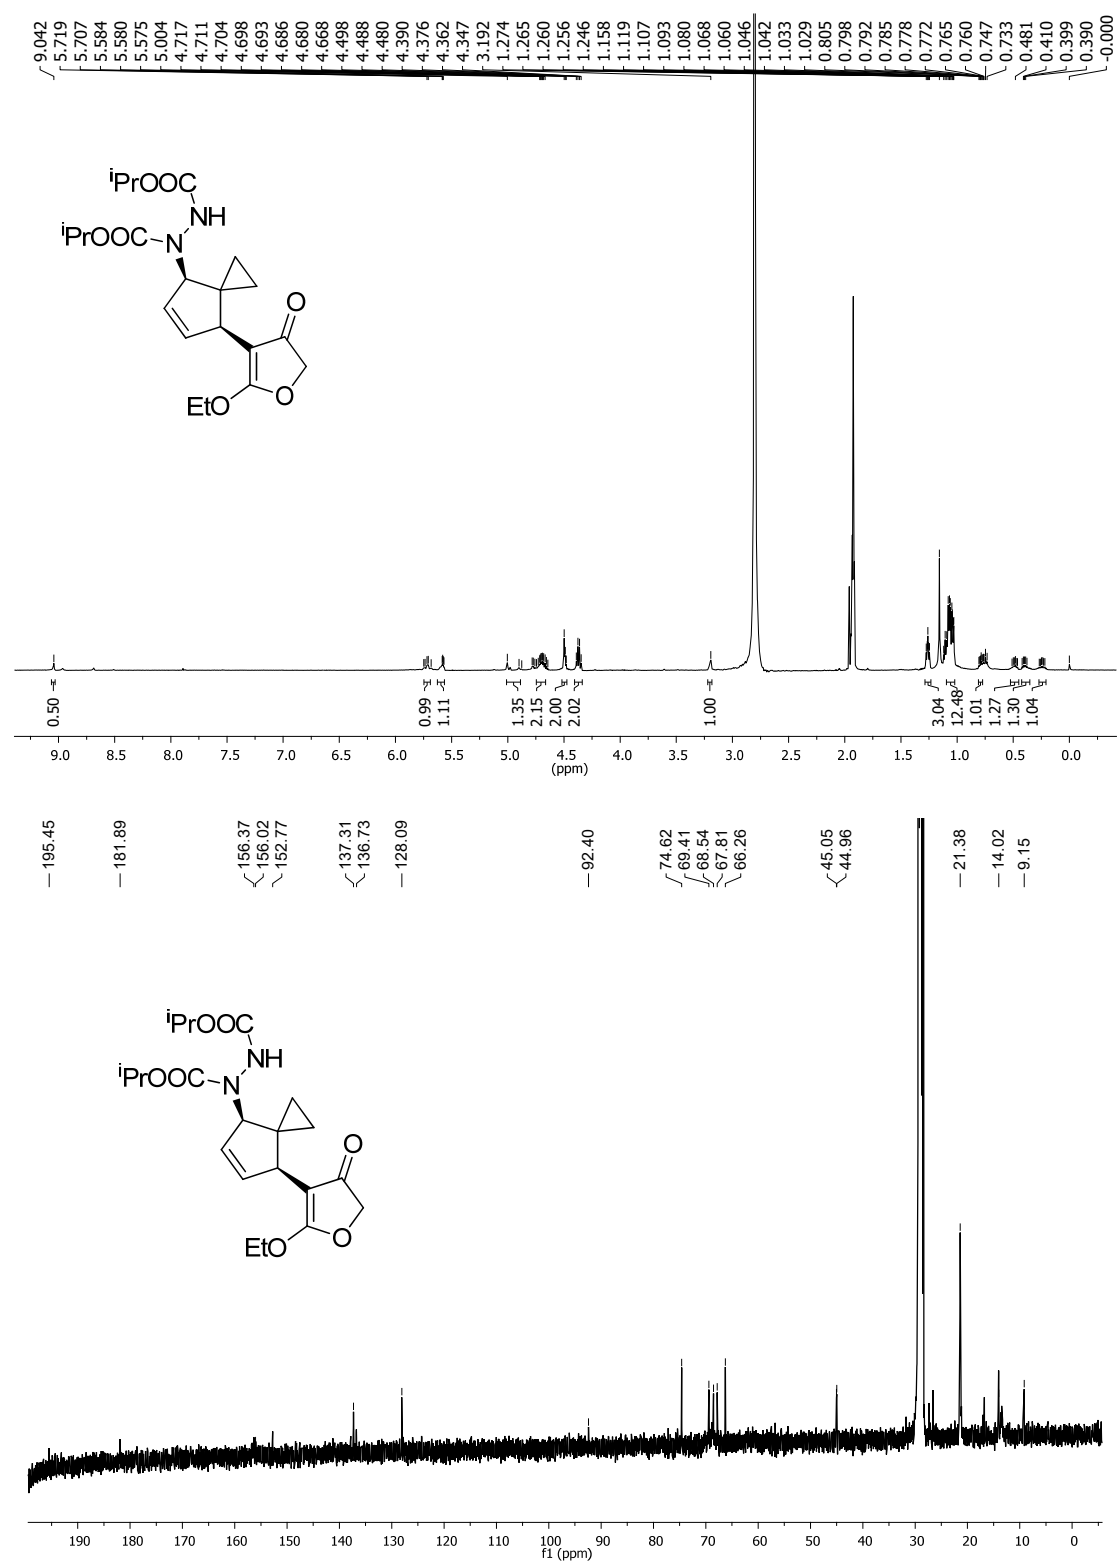

Figure S19  $^1\text{H}$  NMR (500 MHz) &  $^{13}\text{C}$  (125 MHz) Spectra of **5d**

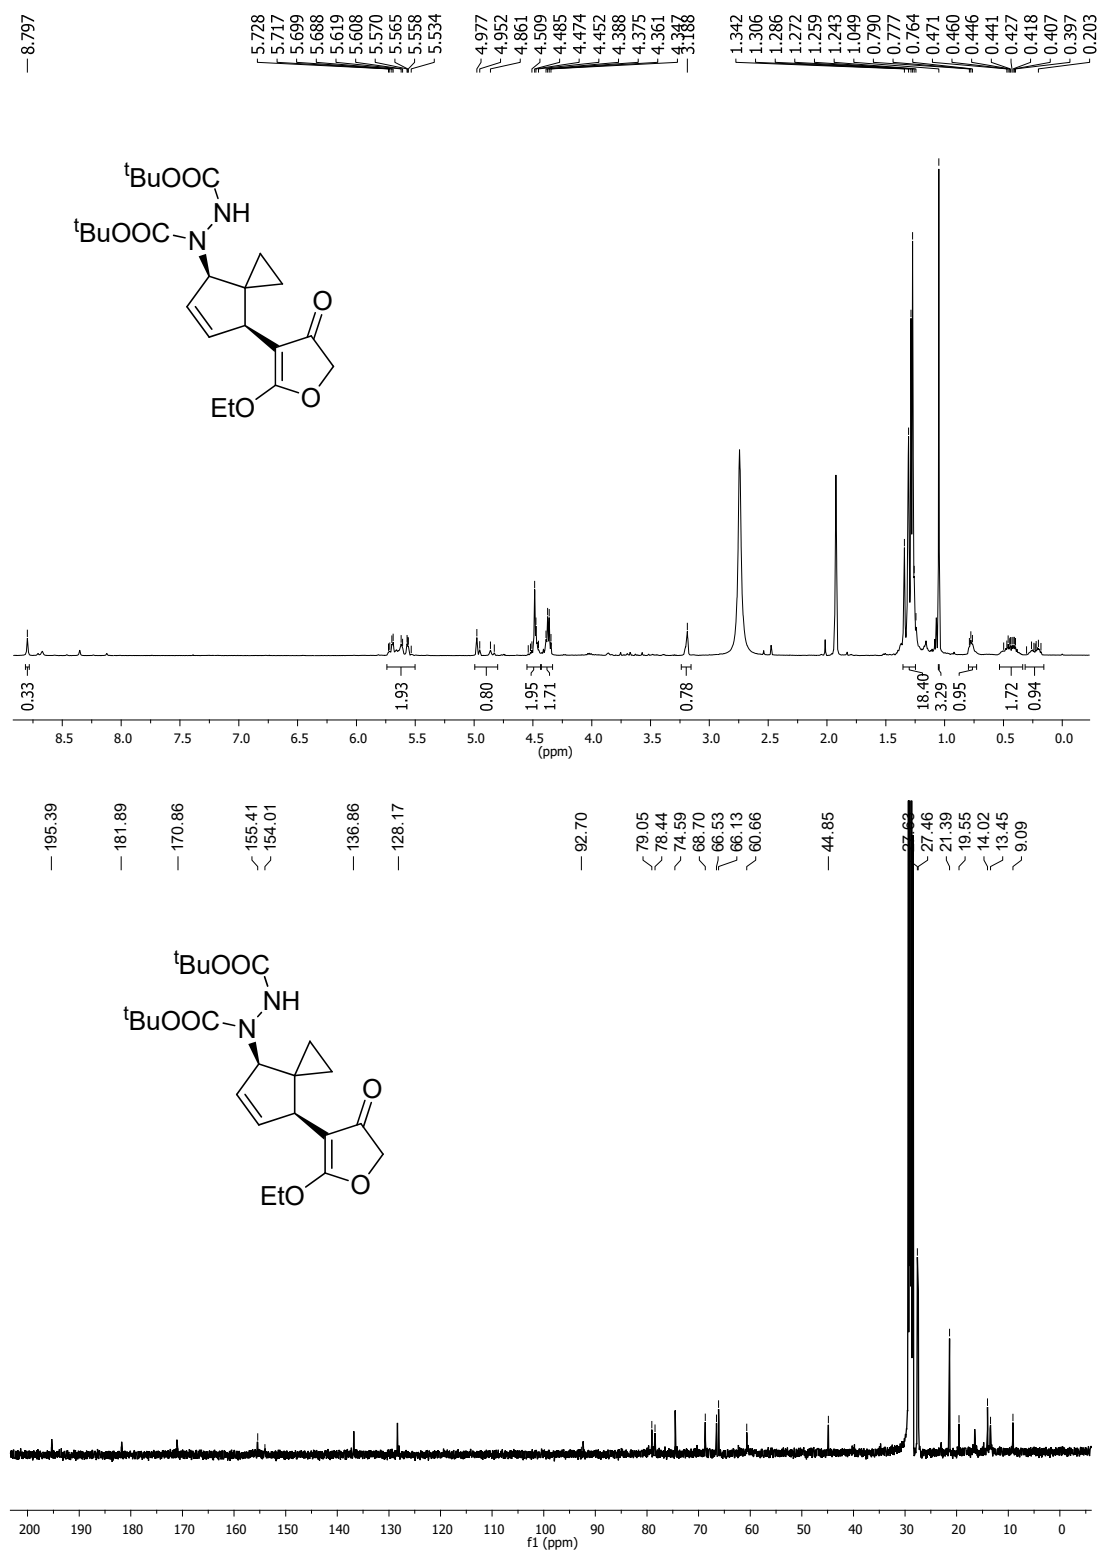

Figure S20  $^1\text{H}$  NMR (500 MHz) &  $^{13}\text{C}$  (125 MHz) Spectra of **5e**

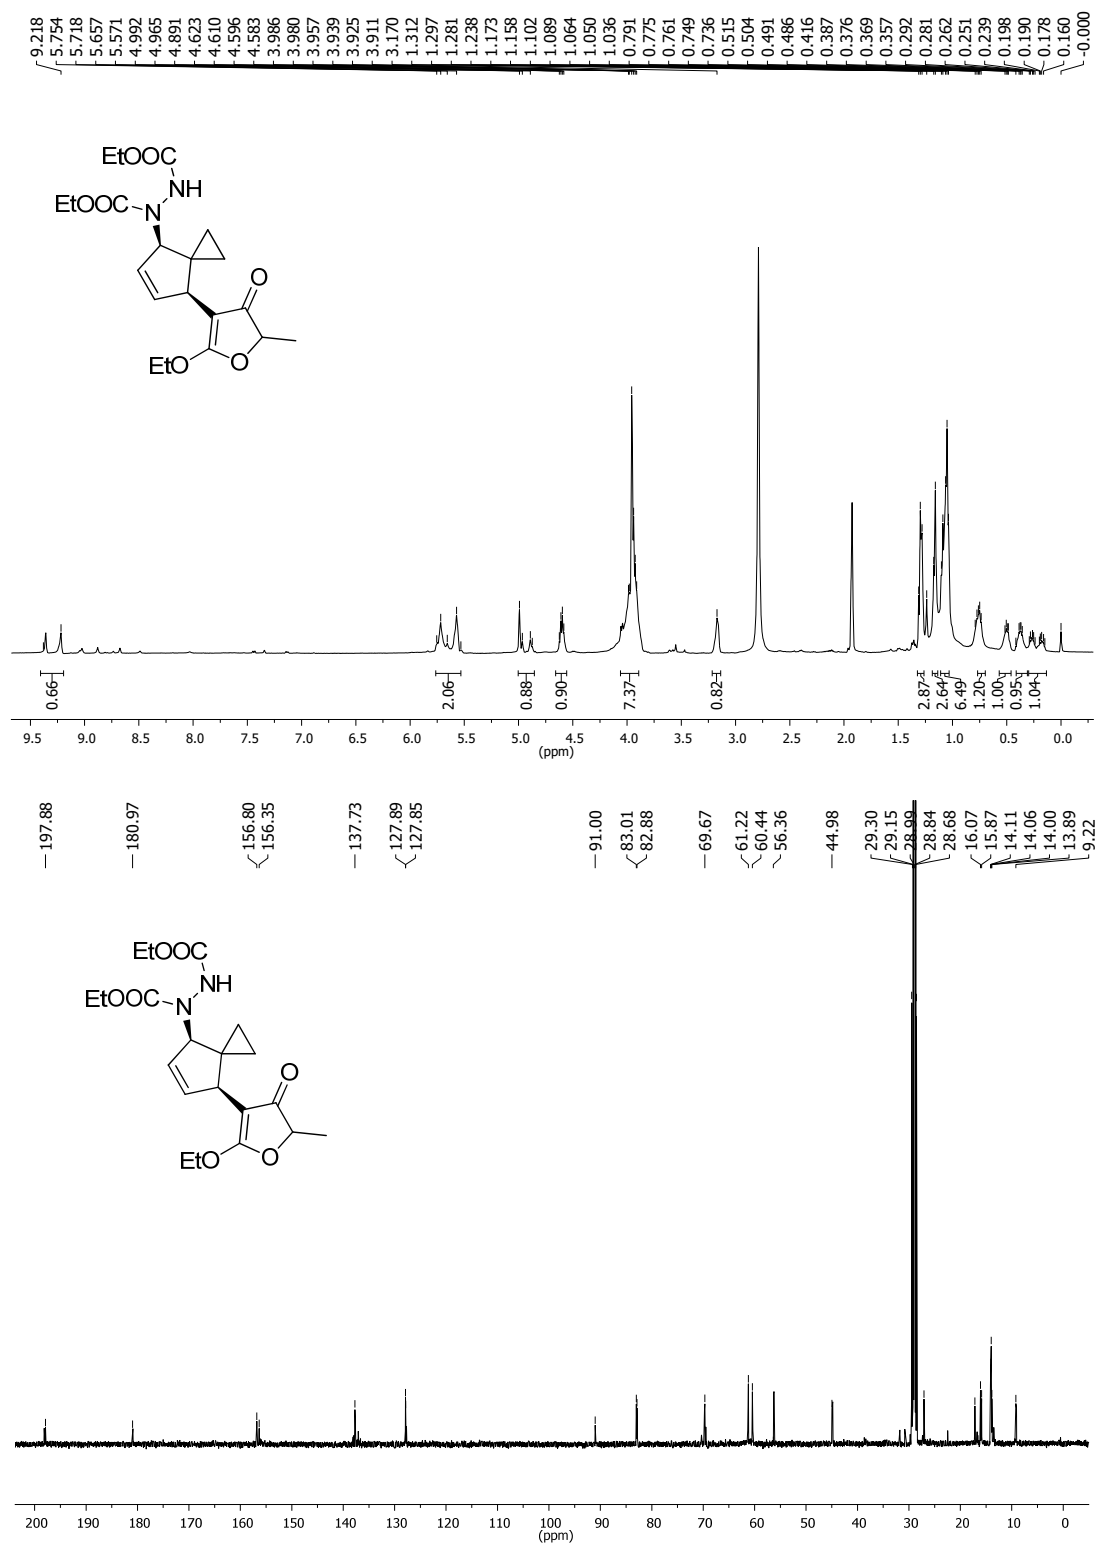

Figure S21  $^1\text{H}$  NMR (500 MHz) &  $^{13}\text{C}$  (125 MHz) Spectra of **5f**

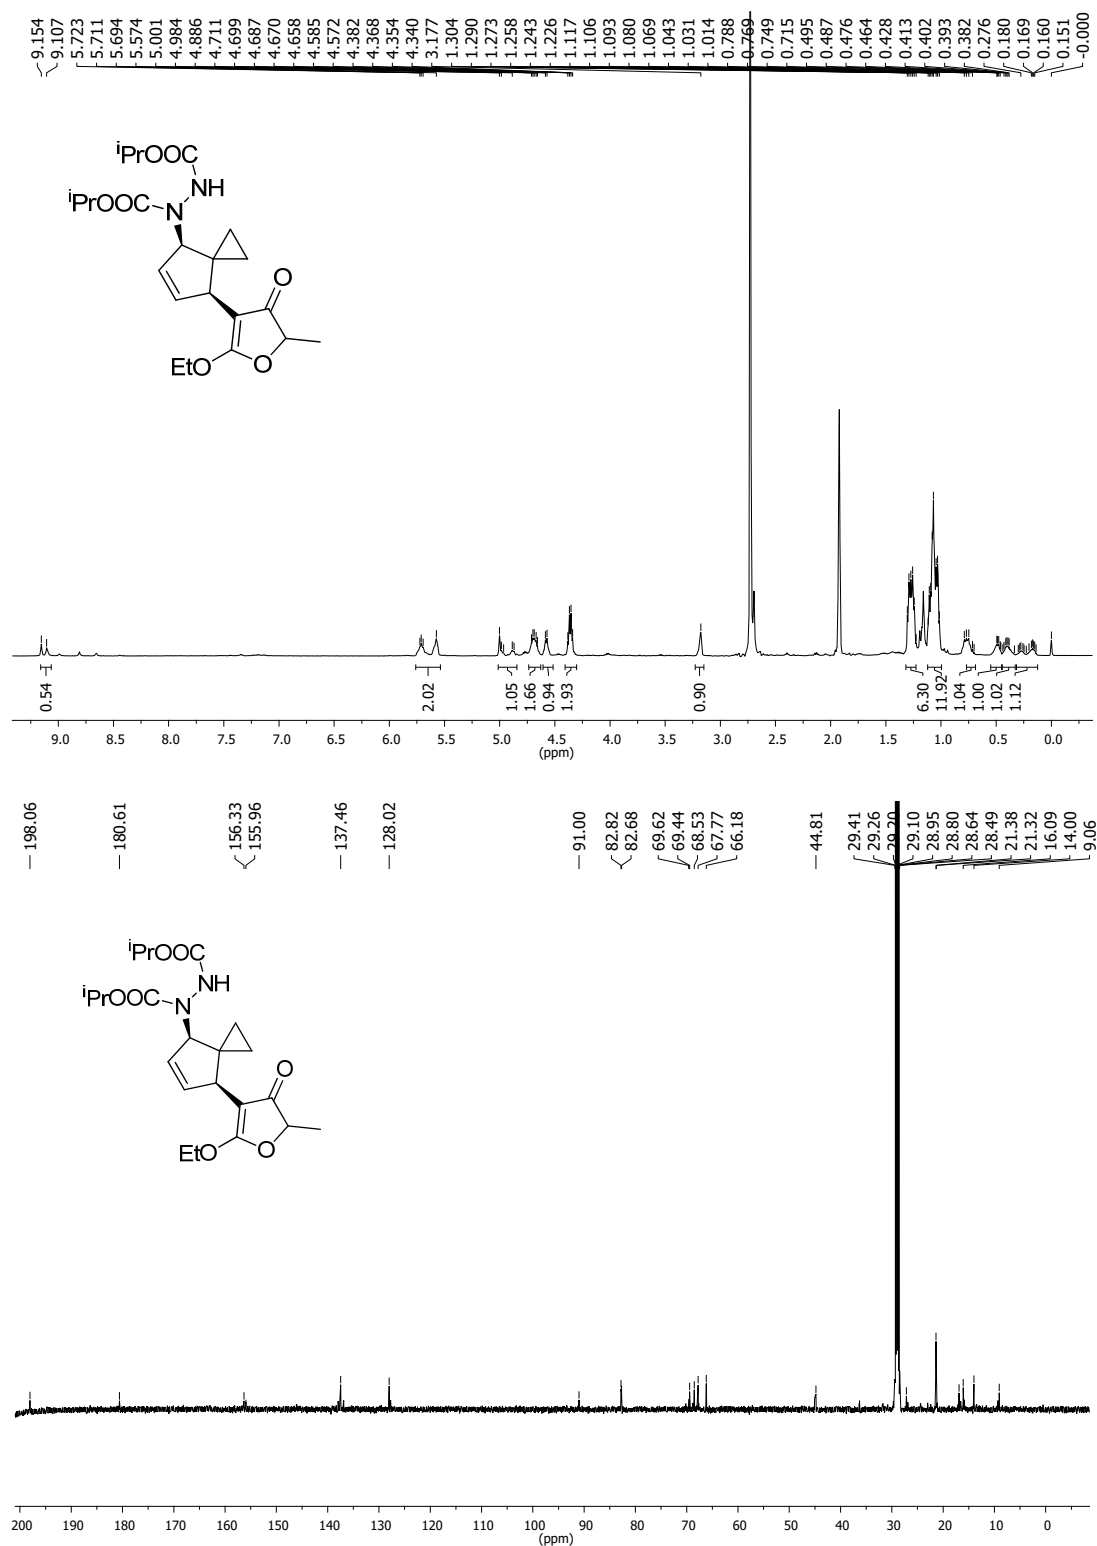

Figure S22  $^1\text{H}$  NMR (500 MHz) &  $^{13}\text{C}$  (125 MHz) Spectra of **7a**

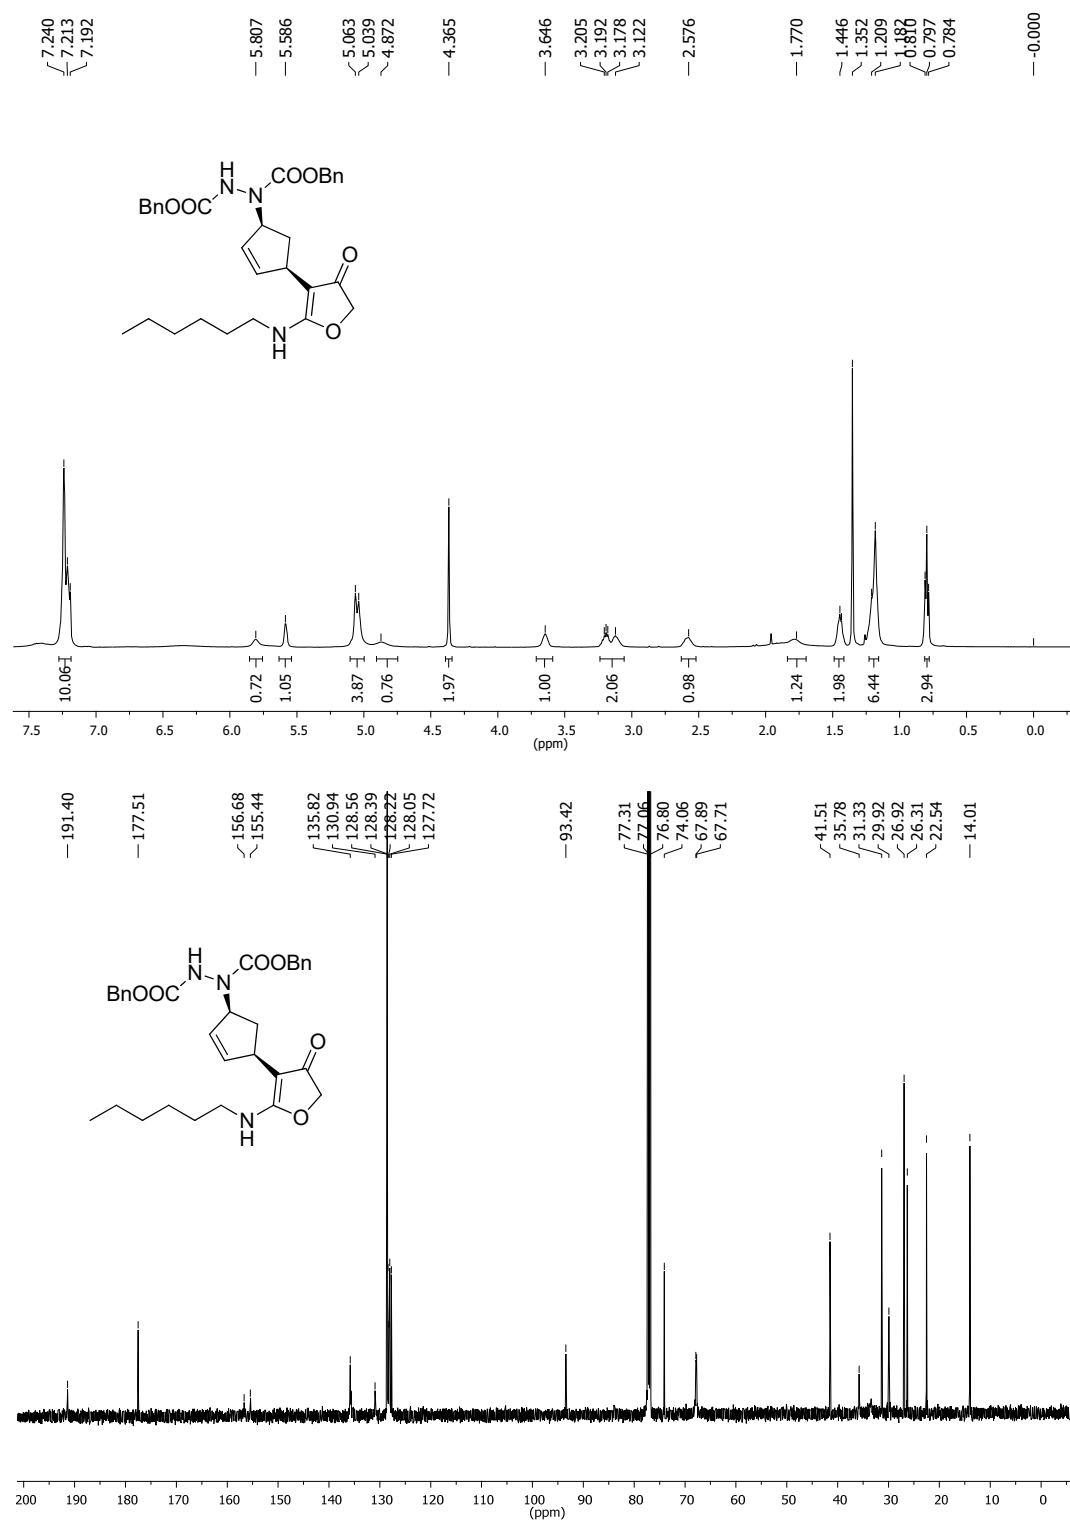



Figure S23  $^1\text{H}$  NMR (500 MHz) &  $^{13}\text{C}$  (125 MHz) Spectra of **7b**

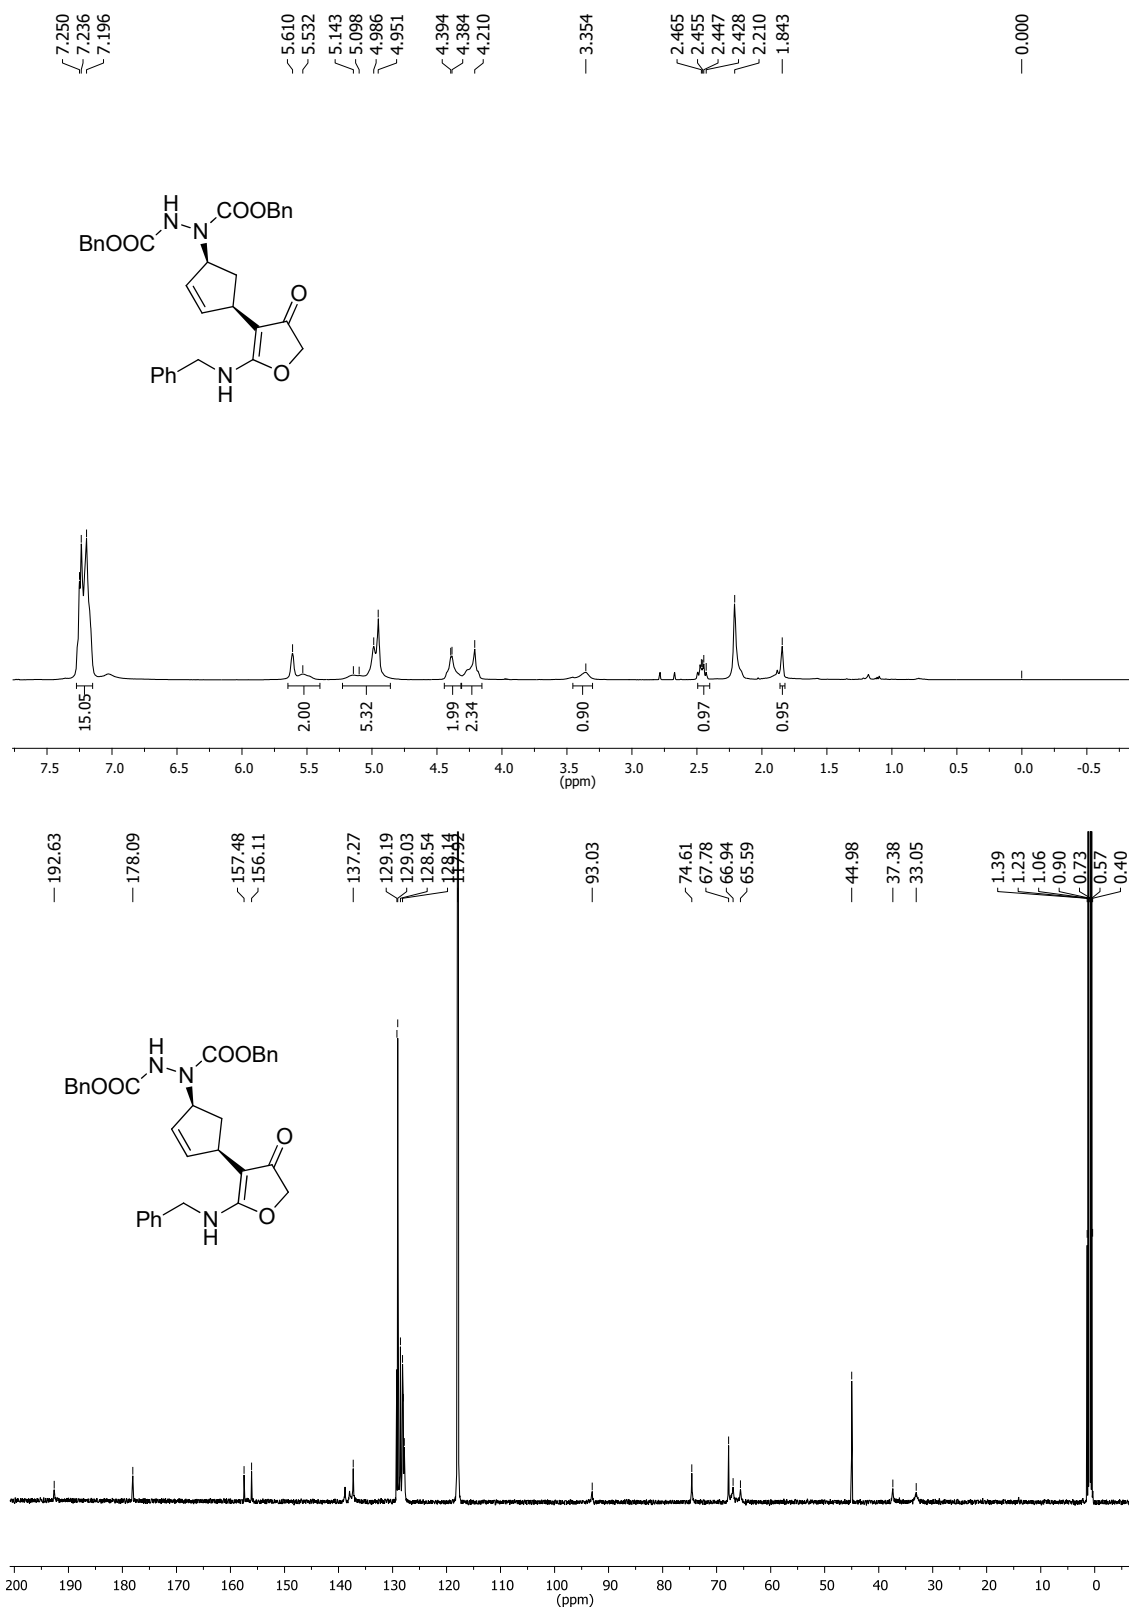

Figure S24  $^1\text{H}$  NMR (500 MHz) &  $^{13}\text{C}$  (125 MHz) Spectra of **7c**

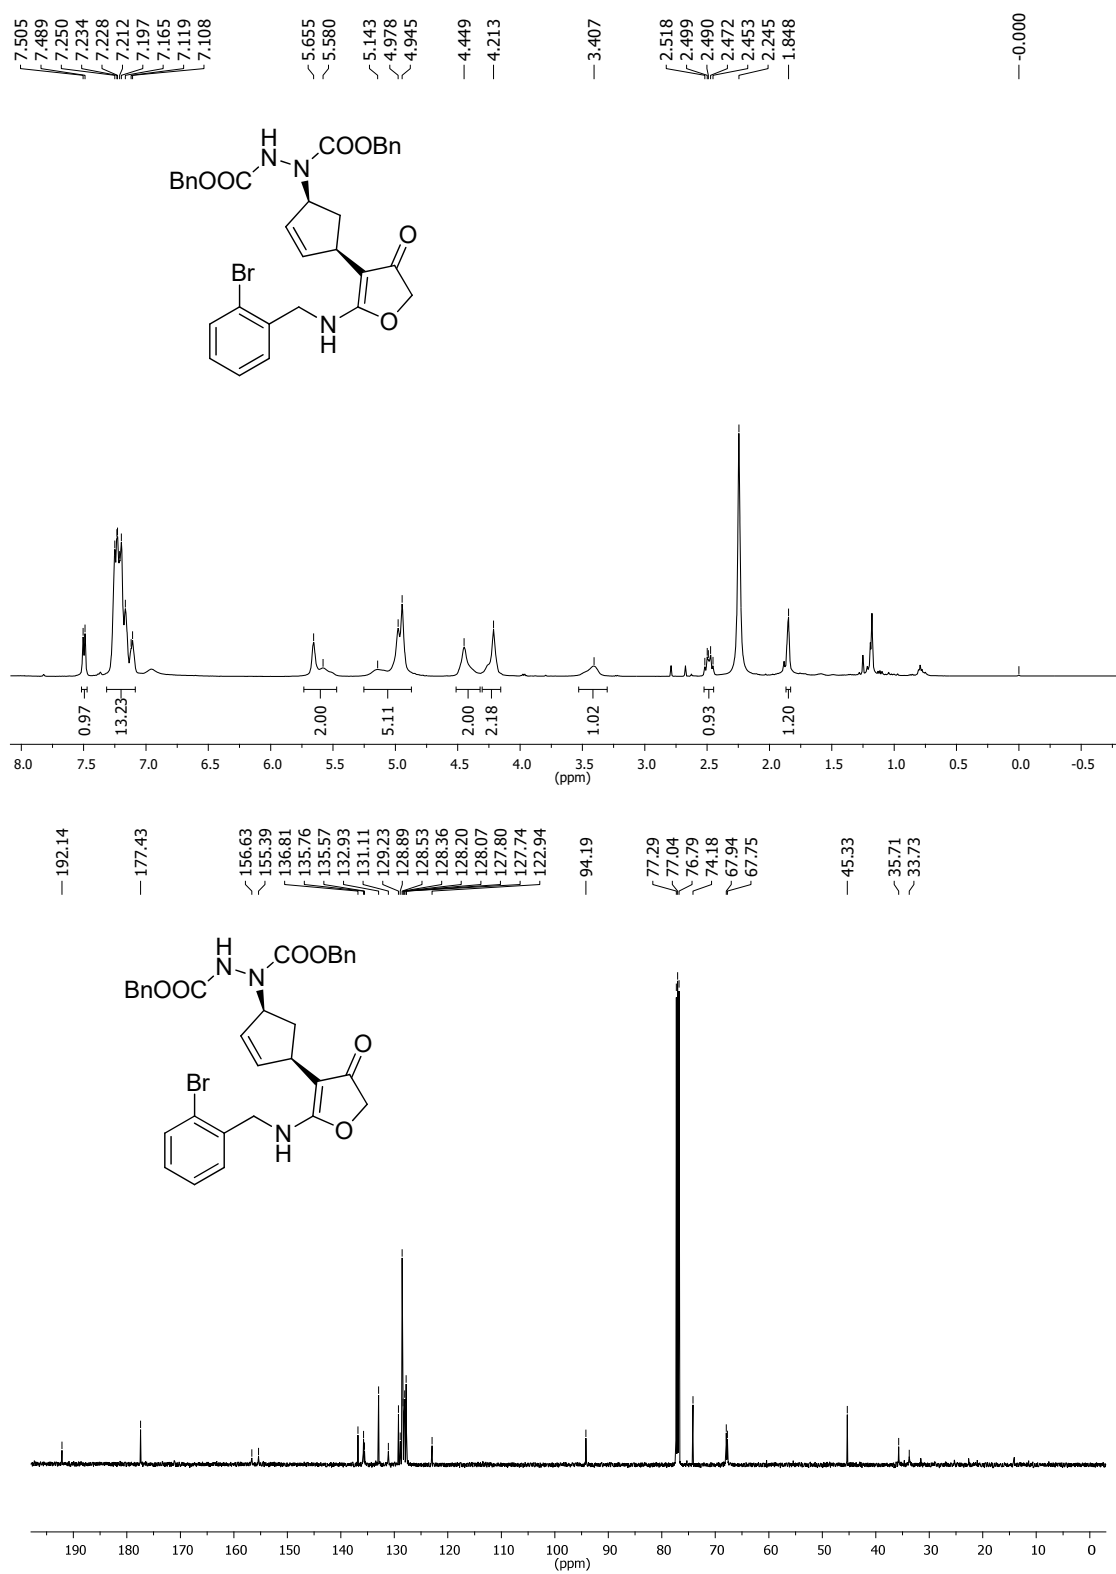

Figure S25  $^1\text{H}$  NMR (500 MHz) &  $^{13}\text{C}$  (125 MHz) Spectra of **7d**

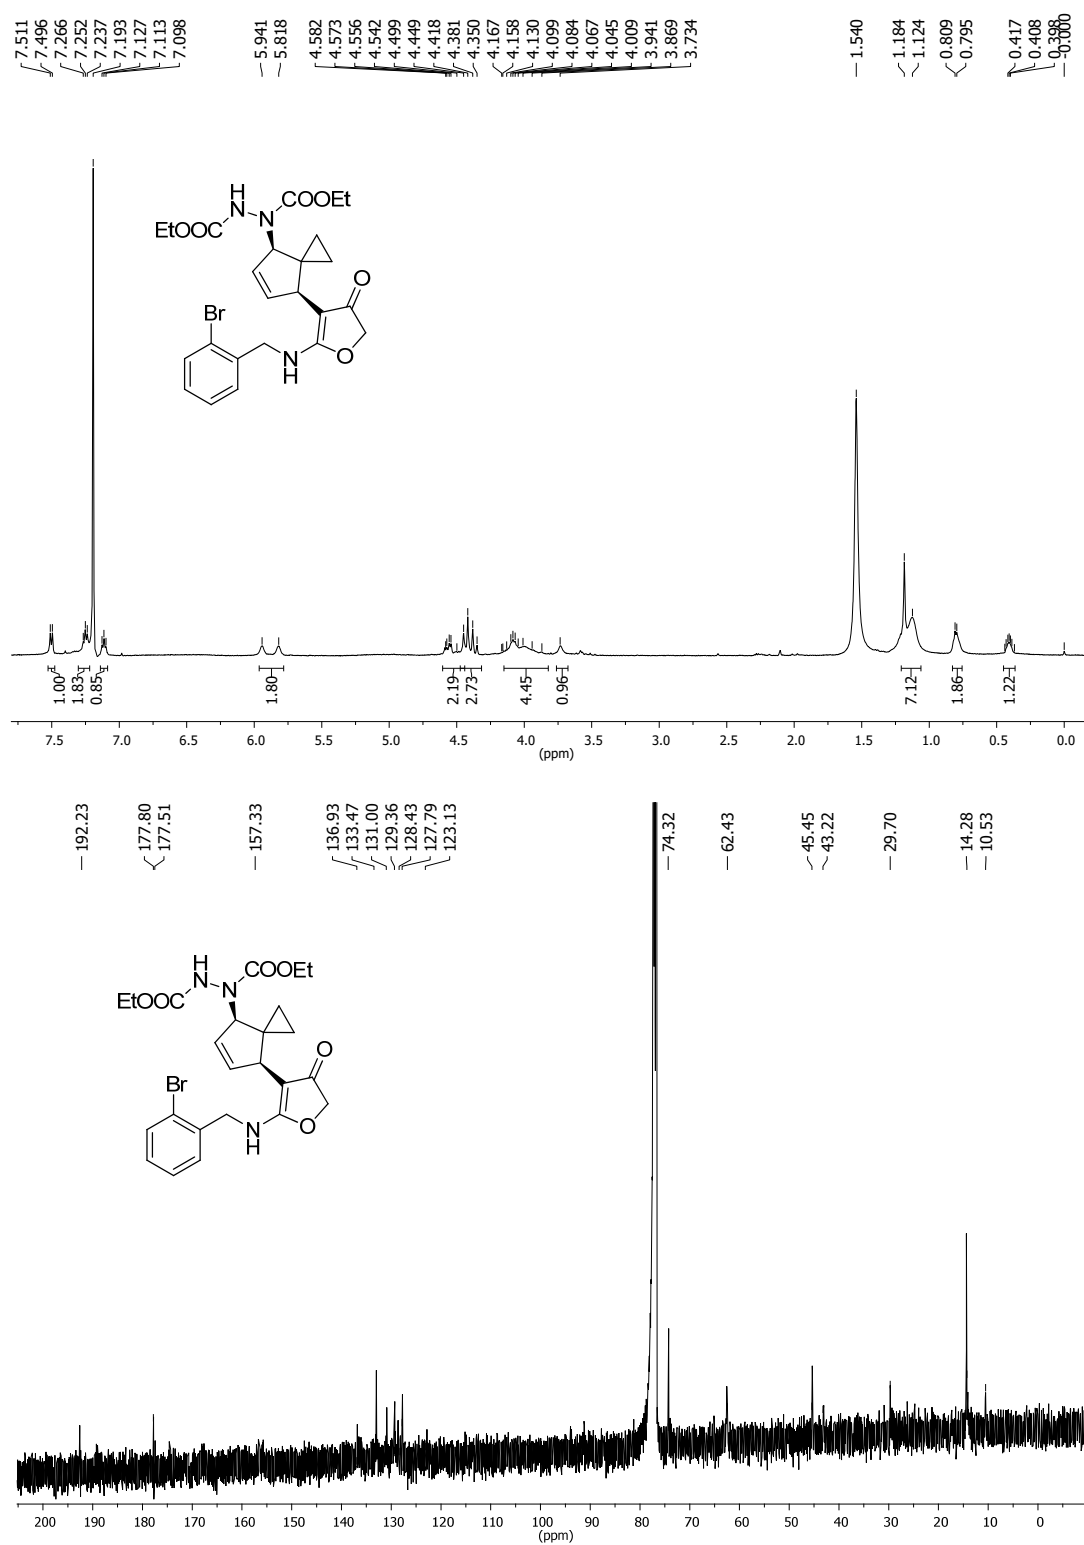

Supplement: s1 [file s1]
